# 1 **Disparity, Diversity, and Duplications in the Caryophyllales**

2 Stephen A. Smith<sup>\*1</sup>, Caroline Parins-Fukuchi<sup>1</sup>, Ya Yang<sup>2</sup>, Michael J. Moore<sup>3</sup>, Samuel F.  
3 Brockington<sup>4</sup>, Riva Bruenn<sup>3,5</sup>, Chloe P. Drummond<sup>3,6</sup>, Joseph W. Brown<sup>1</sup>, Joseph F. Walker<sup>1</sup>,  
4 Noah Last<sup>2</sup>, Norman A. Douglas<sup>3,7</sup>

5  
6 <sup>1</sup>Department of Ecology and Evolutionary Biology, University of Michigan, Ann Arbor, 48103

7 <sup>2</sup>Department of Plant Biology, University of Minnesota-Twin Cities, 1445 Gortner Avenue, St.  
8 Paul, MN 55108

9 <sup>3</sup>Department of Biology, Oberlin College, 119 Woodland St., Oberlin, Ohio 44074-1097

10 <sup>4</sup>Department of Plant Sciences, University of Cambridge, Cambridge CB2 3EA, United  
11 Kingdom

12 <sup>5</sup>Current Address: Department of Plant & Microbial Biology, University of California, Berkeley,  
13 Berkeley, California 94720-3102

14 <sup>6</sup>Current Address: Department of Botany, University of Wisconsin-Madison, 430 Lincoln Drive,  
15 Madison, WI 53706

16 <sup>7</sup>Current address: Department of Biology, University of Florida, 618A Carr Hall, Gainesville, FL  
17 32605

18 CORRESPONDING AUTHOR: Stephen A. Smith; 734-615-5510; [eebsmith@umich.edu](mailto:eebsmith@umich.edu)

19

20 WORD COUNT

21 Total: 5285

22 Summary: 197

23 Introduction: 1177

24 Materials and Methods: 1674

25 Results and Discussion: 2428

26 This manuscript also contains 3 Main Figures (two in color), 4 Main Tables, and 5  
27 Supplementary Figures.

28

29

## 30 **Summary**

- 31 • The role whole genome duplication (WGD) plays in the history of lineages is actively  
32 debated. WGDs have been associated with advantages including superior colonization,  
33 adaptations, and increased effective population size. However, the lack of a  
34 comprehensive mapping of WGDs within a major plant clade has led to questions  
35 regarding the potential association of WGDs and higher diversification rates.
- 36 • Using seven chloroplast and nuclear ribosomal genes, we constructed a phylogeny of  
37 5,036 species of Caryophyllales, representing nearly half of the extant species. We  
38 phylogenetically mapped putative WGDs as identified from analyses on transcriptomic  
39 and genomic data and analyzed these in conjunction with shifts in climatic niche and  
40 lineage diversification rate.
- 41 • Thirteen putative WGDs and twenty-seven diversification shifts could be mapped onto  
42 the phylogeny. Of these, four WGDs were concurrent with diversification shifts, with  
43 other diversification shifts occurring at shallower nodes than WGDs. Five WGDs were  
44 associated with shifts to colder climatic niches.
- 45 • While we find that many diversification shifts occurred after WGDs it is difficult to  
46 directly associate these and consider diversification and duplication to be tightly  
47 correlated. Our findings suggest that duplications may often along with shifts in either  
48 diversification rate, climatic niche, or rate of evolution.

49 *Keywords:* Caryophyllales, duplications, climatic niche, diversification rates, phylogenomics

50

## 51 **Introduction**

52 Understanding the causes and correlates of diversification within flowering plants has been a  
53 central goal of evolutionary biologists. Genomic and transcriptomic data have reinvigorated  
54 hypotheses associating whole genome duplication (WGD) with lineage diversification rate  
55 increases (e.g., Levin, 1983; Levin 2002; Barker et al. 2009; Soltis *et al.*, 2014; Edger et al.  
56 2015; Puttick et al. 2015; Tank *et al.*, 2015; Barker et al. 2016; Huang et al. 2016; McKain et al.  
57 2016). It is not self-evident why WGDs would be associated with increases in lineage  
58 diversification. One hypothesis suggests that the additional genetic material provides a basis to  
59 generate new adaptations (Edger *et al.*, 2015), although this itself assumes a co-occurrence of  
60 adaptation and lineage proliferation (Levin, 1983). The apparent lack of precise co-occurrence of

61 adaptation and lineage proliferation has been explained by the potential of a lag model (Tank et  
62 al. 2015) where diversification may follow WGD events. In the absence of overwhelming  
63 correlative signal, we are often unable to discern true ancient WGD events from aneuploidy  
64 without advanced genomic information such as synteny mapping (Dohm *et al.*, 2012). Because it  
65 is often difficult to distinguish the two, for simplicity we will define WGD broadly to include  
66 putative ancient WGD events (paleopolyploidy) and ancient aneuploidy events. WGD events are  
67 thought to be a common occurrence and have been associated with an estimated 15% of  
68 angiosperm speciation events (Wood *et al.*, 2009). However, whether speciation by WGD is  
69 correlated with higher diversification rates remains highly debated (Mayrose *et al.*, 2011; Soltis  
70 *et al.*, 2014; Tank *et al.*, 2015). Analyses based on recent WGD events have concluded that  
71 immediate extinction rates are higher for polyploid plants (Mayrose *et al.*, 2011; Arrigo and  
72 Barker, 2012). This may result from small initial population sizes and an increased dependence  
73 on selfing. Alternatively, despite the disadvantages of WGD, others have suggested that  
74 polyploids may be superior colonizers (Soltis and Soltis, 2000).

75         Indeed, extreme environments are associated with high levels of WGD, with up to 87%  
76 of species restricted to areas that were glaciated during the last ice age consisting of polyploids  
77 (Brochmann, 2004). However, in the example from Arctic plants, the high level of WGD has  
78 occurred post-glaciation representing a micro-evolutionary period whereas previous studies often  
79 focus at much deeper macro-evolutionary time scales (Mayrose *et al.*, 2011; Tank *et al.*, 2015;  
80 Soltis *et al.*, 2014). From the perspective of a short timescale, polyploidy has the disadvantages  
81 of higher error rates in mitosis (Storchová *et al.*, 2006) and masking of deleterious mutations  
82 allowing them to accumulate to higher frequencies in a population (Otto and Whitton, 2000). A  
83 suite of advantages however may also arise, including gain of asexuality (Miller *et al.*, 2000) and  
84 varying effects of heterosis (Comai, 2005). The net role these advantages and disadvantages play  
85 on the macroevolutionary scale is difficult to determine from either the purely short-term or  
86 purely long-term time scales previously used.

87         The long-term consequence of WGD is a central question in macroevolution and  
88 comparative genomics. However, with a suite of advantages and disadvantages, much debate  
89 surrounds the importance and patterns of correlation of WGD (Comai 2005). While  
90 polyploidization events can cause instant speciation, there is no reason to assume that these  
91 singular speciation events in themselves would influence large-scale diversification rate shifts

92 when considering lineage survivorship. Instead, there may be other factors, such as the increase  
93 in genetic material, perhaps increasing genetic diversity or enabling adaptation, that cause long  
94 term shifts in rates of diversification. Adaptations need not be associated with shifts in the tempo  
95 of diversification and those adaptations and shifts in diversification may not co-occur on the  
96 same branch (i.e., there may be a lag time; Donoghue 2005; Smith et al. 2011, Donoghue and  
97 Sanderson 2015; Tank et al. 2015). In the broader context of plant evolution, there are several  
98 possible outcomes of WGD in relation to the evolution and diversification of clades: 1) no  
99 relationship between WGD and speciation rate or habitat shift/adaptation, 2) WGD coincides  
100 with an increase of speciation rate, with or without a lag time, 3) WGD promotes dispersal and  
101 habitat shifts, which has mixed relationship with speciation rate, and 4) a mixture (some  
102 association, some not), similar to the previous hypothesis but without explicitly promoting  
103 dispersal or habitat shift or speciation (e.g., adaptation could be more prominent than dispersal  
104 and habitat shift). Here, we contribute to this discussion on diversification and WGDs with an in-  
105 depth examination of the intersection of diversification and WGDs happening at a range of scales  
106 within the hyperdiverse Caryophyllales.

107 The Caryophyllales contains ~12,500 species in 39 families (Thulin *et al.*, 2016; APG IV:  
108 Chase *et al.*, 2016), representing approximately 6% of extant angiosperm species diversity. The  
109 estimated crown age of Caryophyllales is approximately 67–121 millions of years ago (mega-  
110 annum, Ma) (Bell *et al.*, 2010; Moore *et al.*, 2010) and species of the Caryophyllales exhibit  
111 extreme life-history diversity, ranging from tropical trees to temperate annual herbs, and from  
112 desert succulents (e.g., Cactaceae) to a diverse array of carnivorous plants (e.g., the sundews  
113 *Drosera* and pitcher plants *Nepenthes*). Such extraordinary diversity makes Caryophyllales a  
114 particularly useful system for investigating the relationship between WGD vs. diversification and  
115 niche evolution. Our previous analyses using 62 transcriptomes representing 60 species across  
116 the Caryophyllales identified 13 well-supported ancient WGD events (Yang *et al.*, 2015). We  
117 have since nearly tripled the taxon sampling and assembled a data set comprising high-coverage  
118 transcriptomes and genomes from 169 species across the Caryophyllales (Yang *et al.*,  
119 submitted), providing even greater power for resolving the number and phylogenetic locations of  
120 WGD events. Moreover, the growth in the number of plant taxa on GenBank that are represented  
121 by traditional targeted sequences (e.g., *rbcL*, *matK*, ITS, etc.) and the growth of publicly

122 available collections data (e.g., GBIF, iDigBio) provide excellent opportunities to apply  
123 megaphylogeny and niche diversification approaches at fine scales in Caryophyllales.

124 By examining WGDs and diversification within the Caryophyllales, we present an  
125 important example. Not only does the dataset examined have a high density of transcriptomic  
126 sampling, the diversification of the bulk of Caryophyllales occurred during a time frame  
127 intermediate to that of most published studies that have probed a link between WGD and  
128 macroevolution. This time frame, between 10 and 100 Ma, is important for angiosperms as much  
129 of the diversification that has led to the modern flora occurred during this period and most  
130 modern angiosperm families appeared by this time. Discussion of speciation rate, niche shift, and  
131 WGD would be flawed without accurate mappings of WGD events within this time scale. We  
132 compiled a data set with extensive and precise mapping of WGD combined with a species-level  
133 phylogeny. The megaphylogeny approach has been used extensively in the past to combine data  
134 from many gene regions and across broad taxonomic groups to address evolutionary questions  
135 (Smith *et al.*, 2009). Here, we use this approach to help inform analyses from phylogenomic  
136 studies, and provide a broad context in which to examine these genomic phenomena. With half  
137 of the species sampled, this represents to date the largest and most exhaustive study of WGD vs.  
138 rate and adaptive shift.

139

## 140 **Materials and Methods**

141 **Sanger sequencing and assembly.**—A total of 248 new *matK* sequences were included in this  
142 study (Table 1). To generate these sequences, leaf samples were collected in silica in the field or  
143 from cultivated material, or were collected from herbarium sheets. DNA was isolated using  
144 either the Nucleon Phytopure kit (GE Healthcare Life Sciences, Pittsburgh, PA, USA), using the  
145 0.1 g protocol and following manufacturer's instructions, or using the Doyle and Doyle (1987)  
146 protocol, with the addition of 1% PVP-40. An approximately 950 bp region in the middle of the  
147 *matK* gene was amplified and sequenced using custom-designed primers (Table 2). PCRs were  
148 performed in 12.5  $\mu$ L volumes with 0.5  $\mu$ L of 5 mM primer for both primers, 5-20 ng of DNA  
149 template, 0.1  $\mu$ L of GoTaq (Promega, Madison, WI, USA), 6.25  $\mu$ L of Failsafe Premix B  
150 (Epicentre, Madison, WI, USA), and 4.7  $\mu$ L of sterile, deionized water. Reactions were run on a  
151 Bio-Rad PTC 200 thermocycler (Bio-Rad, Hercules, CA, USA) at Oberlin College. Individual  
152 PCRs were cleaned in 16.5  $\mu$ L reactions containing 10 U of Exonuclease I (Affymetrix,

153 ThermoFisher Scientific, Waltham, MA, USA), 2 U of shrimp alkaline phosphatase  
154 (Affymetrix), 8  $\mu$ L of PCR product, and 8.5  $\mu$ L of sterile, deionized water. Sanger sequencing of  
155 the resulting cleaned PCRs was conducted by Neogenomics (formerly SeqWright; Houston, TX,  
156 USA) using an ABI 3730xl automated sequencer (Applied Biosystems, ThermoFisher  
157 Scientific). The resulting forward and reverse sequences for each reaction were trimmed and *de*  
158 *novo* assembled using default parameters of the Geneious assembler in Geneious versions 5-7  
159 (Biomatters, Auckland, New Zealand).

160

161 **Molecular Data for Phylogenetic Reconstruction.**—Nucleotide data from the nuclear  
162 ribosomal internal transcribed spacers (ITS) and *phyC* gene, and the plastid loci *matK*, *ndhF*,  
163 *rbcL*, *trnH-psbA* spacer, and *trnL-trnF* spacer were used to reconstruct the phylogeny. These data  
164 were gathered first using PHLAWD (Smith and Donoghue, 2008; Smith *et al.*, 2009) and then  
165 curated and combined with newly sequenced *matK* data for 124 additional species. This yielded  
166 the following sampling: ITS 2,969 species, *matK* 2,270 species, *ndhF* 417 species, *phyC* 172  
167 species, *rbcL* 947 species, *trnH-psbA* 240 species, and *trnL-trnF* 1,996 species. We used *matK*,  
168 *rbcL*, and *ndhF* sequences from *Aextoxicon*, *Apium*, *Berberidopsis*, *Campanula*, *Clethra*, *Coffea*,  
169 *Echinops*, *Helwingia*, *Ilex*, *Ipomoea*, *Lamium*, *Lonicera*, *Nyssa*, *Polysoma*, *Primula*, *Santalum*,  
170 *Valeriana*, and *Viburnum* to represent outgroups.

171

172 **Phylogenetic Reconstruction.**—We conducted phylogenetic analyses with RAxML v7.2.8  
173 (Stamatakis, 2014) using the full analysis command, -f a, which conducts a rapid bootstrap and  
174 then a full maximum likelihood search. The combined bootstrap and maximum likelihood search  
175 allows for a more thorough for maximum likelihood analysis where the initial rapid bootstrap  
176 results prime the maximum likelihood analysis. However, we did not use the rapid bootstrap  
177 trees from this analysis and instead, we conducted a full bootstrap, generating the bootstrap  
178 dataset using phyx (Brown *et al.*, 2017) and then conducting individual maximum likelihood  
179 runs on each constructed bootstrap dataset. We conducted bootstraps within gene regions and we  
180 retained the individual bootstrap alignments to conduct additional analyses (i.e., bootstrapped  
181 alignments contained the same number of gene-specific sites as the empirical alignment). On  
182 each of the resulting trees of the bootstrap and the maximum likelihood tree, we conducted SH-  
183 like approximate likelihood ratio tests (SH-aLRT; Guindon *et al.*, 2010) as implemented in

184 RAxML. These analyses calculate support for each edge while also finding the NNI-optimal  
185 topology. RAxML completed the likelihood search for each of these bootstrap replicates,  
186 however the SH-aLRT analyses often resulted in an improved maximum likelihood topology.  
187 The trees that resulted from the SH-aLRT, ML and bootstrap samples, were used for further  
188 analyses. Because several deep relationships within Caryophyllales are hard to resolve without  
189 large amounts of molecular data that are unavailable for most of the taxa included in this analysis  
190 (Yang *et al.*, 2015), for all phylogenetic analyses we applied the following topological constraint:  
191 (Droseraceae, (*Microtea*, (Stegnospermataceae, Limeaceae, (Lophiocarpaceae, (Barbeuiaceae,  
192 Aizoaceae)))))) as per previous analysis (Brockington *et al.* 2009; Yang *et al.*, 2015).

193

194 **Divergence Time Estimation.** — Few tractable options for divergence time estimation exist for  
195 datasets of the size presented here. We use the penalized likelihood approach (Sanderson, 2003)  
196 as implemented in the program treePL (Smith and O’Meara, 2012), which can handle large-scale  
197 phylogenies. The early fossil record of the Caryophyllales is sparse with only a few known  
198 records (Friis *et al.*, 2011; Arakaki *et al.*, 2011): (1) fossil pollen has been ascribed to  
199 Amaranthaceae (*Chenopodipollis*) from the Paleocene of Texas (Nichols and Traverse, 1971);  
200 (2) a putative fossil infructescence from within the Phytolaccaceae in the Campanian has also  
201 been reported (Cevallos-Ferriz *et al.*, 2008), but this phylogenetic position has been disputed  
202 (pers. comm. S. Manchester) and hence we excluded it; (3) Jordan and Macphail (2003) describe  
203 a middle to late Eocene inflorescence from the species *Caryophylloflora paleogenica*, ascribed to  
204 Caryophyllaceae; (4) pollen from Argentina within the Nyctaginaceae has been reported from the  
205 middle Eocene (Zetter *et al.*, 1999); and (5) (Degreef, 1997). The penalized likelihood method  
206 performs better when a calibration is used at the root. For this calibration, and because there is no  
207 fossil record for the earliest Caryophyllales, we use a secondary calibration from the  
208 comprehensive angiosperm divergence time analyses of Bell *et al.* (2010). Several other  
209 secondary calibrations were attached to major clades where fossils are not available (Ocampo  
210 and Columbus 2010; Arakaki *et al.* 2011; Schuster *et al.* 2013; Valente *et al.* 2013; see Supp.  
211 Table S1 for detail on placement and calibrations). We conducted a priming analysis to  
212 determine the best optimization parameter values. We then performed a cross validation analysis  
213 using the random cross validation setting to determine the optimal smoothing parameter value.

214

215 **Climate analyses.**—We downloaded 6,592,700 georeferenced occurrences for the  
216 Caryophyllales from GBIF (accessed on 6/1/2015; <http://gbif.org>). After removing samples  
217 present in living collections, and therefore not necessarily representative of native climates, and  
218 removing samples whose localities were over water, there were 6,009,552 samples. We extracted  
219 bioclimatic values for each coordinate using the 2.5 arc-minute resolution data from WorldClim  
220 (<http://worldclim.org>). We only included taxa that had at least three samples in these analyses to  
221 reduce potential errors and to have the minimum number of samples required to calculate mean  
222 and variance. The resulting overlap of the taxa represented in both the geographic and genetic  
223 data was 2,843 taxa. We conducted principal component analyses (PCA) on these extracted  
224 values. With both the bioclimatic values and the first two axes of the PCA, we conducted  
225 ancestral state reconstruction analyses.

226 We also conducted contrast analyses and calculated Brownian motion rates of evolution  
227 between sister clades (comparing duplicated lineages with their sisters) for mean annual  
228 precipitation, mean annual temperature, and principal component axis 1. Contrasts were  
229 calculated using phylogenetic independent contrasts. Brownian motion rates were calculated on  
230 sister lineages independently using the analytical solution for rate:  $\sigma^2 = \frac{1}{n} \sum_{i=1}^n \frac{u_i^2}{v_i^2}$ .

231  
232 **Diversification analyses.**—To map diversification rate shifts, we conducted MEDUSA (Alfaro  
233 *et al.*, 2009; Pennell *et al.*, 2014) analyses on the maximum likelihood tree and the bootstrap  
234 trees. MEDUSA is far more computationally tractable than some other diversification estimation  
235 methods (e.g., BAMM). Furthermore, we required the ability to feasibly integrate over the  
236 phylogenetic uncertainty within the phylogenetic dataset because of both the nature of the larger  
237 phylogenetic dataset and the inherent biological uncertainty within the Caryophyllales.  
238 MEDUSA fits a birth-death model of diversification (with parameters  $r$ : net diversification (birth  
239 - death), and  $\epsilon$ : relative extinction (death / birth)) before using stepwise AIC (Burnham and  
240 Anderson, 2002) to identify shifts in rates of diversification. These analyses allow  
241 complementary analyses targeted at accommodating topological and branch length uncertainty.  
242 We performed these diversification analyses using a birth-death model on 97 chronograms  
243 generated from nonparametric bootstrapping of the original matrix, inferring ML trees in  
244 RAxML, and estimating divergence times in treePL using the temporal constraints described



245 above. We discarded three trees based on poor fossil placement resulting from phylogenetic  
246 uncertainty causing fossil placements to conflict.

247

248 ***Whole Genome Duplication Identification.*** — To identify WGDs (procedure described below),  
249 we generated a tree based on transcriptomic data. For this tree, we used 178 ingroup data sets  
250 (175 transcriptomes, 3 genomes) representing 169 species in 27 families and 40 outgroup  
251 genomes (Table S1-S2 in Yang et al. submitted). We mapped putative WGD events using  
252 multiple strategies: gene tree topology, plotting synonymous distance, and chromosome counts  
253 (Yang et al. 2015; Yang *et al.*, submitted). For gene tree topology analyses, we performed two  
254 alternative strategies for mapping duplication events from gene trees to the species tree: mapping  
255 to the most recent common ancestor (MRCA), or mapping to species tree only when gene tree  
256 and species tree topologies are compatible.

257 To conduct synonymous distance analyses, we performed the following procedure. For  
258 all ingroup Caryophyllales transcriptome data sets, we calculated the distribution of paralog  
259 synonymous distance following the same procedure as (Yang *et al.*, 2015). We reduced highly  
260 similar peptide sequences with CD-HIT (-c 0.99 -n 5). We also carried out an all-by-all BLASTP  
261 within each taxon using an E value cutoff of 10 and -max\_target\_seq set to 20. Resulting hits  
262 with pident < 20% or niden < 50 amino acids were removed. We removed sequences with ten or  
263 more hits to avoid overrepresentation of gene families that experienced multiple recent  
264 duplications. We used the remaining paralog pairs and their corresponding CDS to calculate Ks  
265 values using the pipeline [https://github.com/tan\\_ghaibao/bio-](https://github.com/tan_ghaibao/bio-pipeline/tree/master/synonymous_calculation)  
266 [pipeline/tree/master/synonymous\\_calculation](https://github.com/tan_ghaibao/bio-pipeline/tree/master/synonymous_calculation) (accessed November 29, 2014). The pipeline first  
267 carries out pairwise protein alignment using default parameters in ClustalW (Larkin *et al.*, 2007),  
268 back-translates the alignment to a codon alignment using PAL2NAL (Suyama *et al.*, 2006), and  
269 calculates the synonymous substitution rate (Ks) using yn00 as part of the PAML package  
270 (Yang, 2007), with Nei–Gojobori correction for multiple substitutions (Nei and Gojobori, 1986).  
271 We obtained chromosome counts from the Chromosome Counts Database (CCDB;  
272 <http://ccdb.tau.ac.il> accessed Oct 5, 2015). When multiple counts were reported from different  
273 authors or different plants, we erred on the conservative estimate and recorded the lowest  
274 number. For species that were not available in the database, we found counts from the literature

275 (e.g., Jepson eFlora <http://ucjeps.berkeley.edu/eflora/> and Flora of North America  
276 <http://floranorthamerica.org>) or by a consensus from species of the same genera.

277

## 278 **Results and Discussion**

279 **Phylogenetic results.** —Phylogenetic analyses showed strong support based on bootstrap and  
280 SH-aLRT values for the monophyly of most Caryophyllales families (see Fig. S1). We find  
281 strong support for the carnivorous clade including Droseraceae, Ancistrocladaceae,  
282 Nepenthaceae, Drosophyllaceae, and Dioncophyllaceae. There is also strong support for this  
283 clade as sister to a clade including Frankeniaceae, Tamaricaceae, Plumbaginaceae, and  
284 Polygonaceae. However, relationships among the families show more varied support. There is  
285 weak support for the placement of other families relative to other early diverging Caryophyllales  
286 (see Fig. S1). There is strong support for Caryophyllaceae sister to Amaranthaceae. There is very  
287 weak support for Aizoaceae sister to Phytolaccaceae+Nyctaginaceae. As with previously  
288 published analyses, there was no support for the monophyly of Phytolaccaceae in the traditional  
289 sense (i.e., including Phytolaccaceae s.s., Petiveriaceae, and *Agdestis*; APG IV) and very weak  
290 support for the placement of Sarcobataceae. There is also weak support for the relationships  
291 among Limeaceae, Molluginaceae, and the Portulacineae. Many of these relationships have been  
292 found to be strongly supported but conflicting in different analyses (Brockington *et al.*, 2009;  
293 Soltis *et al.*, 2011; Yang *et al.*, 2015; Smith *et al.*, 2015; Walker *et al.*, 2017). Here, we focus less  
294 on the systematic resolution within the Caryophyllales and instead examine the potential  
295 relationship of diversification and climate shifts to WGDs. Therefore, we place more emphasis  
296 on including more taxa over that of more gene regions (i.e., transcriptomes) at the cost of more  
297 missing data. Confident resolution of many of the systematic relationships will require genomic  
298 and transcriptomic sampling, and more thorough taxon sampling (Yang *et al.*, submitted).

299

300 **Climate tolerance reconstruction results.** —We performed climate ancestral reconstruction  
301 analyses on the phylogeny of 2,843 taxa that included taxa with at least three sampled  
302 geographic coordinates (Figs. 1-3). These analyses were conducted for visualization and for  
303 comparison with diversification and WGD results (see below). Results for individual bioclimatic  
304 variables and principal components can be found in Figs. S2-S4. Bioclimatic variable 1 (mean  
305 annual temperature, Fig. 1) shows that there are several strong phylogenetic patterns of clades

306 with preferences for colder or warmer regions. For example, Polygonaceae, Caryophyllaceae,  
307 and Montiaceae each are dominated by taxa with preferences for cold environments, although  
308 each also contains early-diverging taxa with preferences to warm environments. In contrast, taxa  
309 inhabiting warm environments predominate in Cactaceae, Amaranthaceae, Aizoaceae, the  
310 carnivorous clade (Droseraceae, Drosophyllaceae, Nepenthaceae, Ancistrocladaceae,  
311 Dioncophyllaceae), and the phytolaccoid clade (Nyctaginaceae, Phytolaccaceae, Petiveriaceae,  
312 Sarcobataceae, and *Agdestis*). Bioclimatic variable 12 (mean annual precipitation) shows a  
313 relatively consistent pattern of relatively dry to intermediately wet clades throughout the group.  
314 Indeed, only a few clades inhabiting wet ecosystems (in this case, the wet tropics) exist in the  
315 Caryophyllales, specifically small groups within the carnivorous clade, the phytolaccoids, early-  
316 diverging Polygonaceae, and other small groups throughout the Caryophyllales. The principal  
317 component loadings are presented in Fig. 2 and Fig. S5. Principal component 1, PCA1, shows  
318 significant differentiation throughout the Caryophyllales, as for example, early-diverging  
319 Polygonaceae vs the rest of Polygonaceae, early diverging Caryophyllaceae vs the rest of  
320 Caryophyllaceae, phytolaccoids vs Aizoaceae, and Portulacineae + relatives vs Cactaceae, to  
321 mention a few. These results generally reflect the extensive ecological diversification throughout  
322 the group. They also reflect significant diversification in the temperate regions of the world  
323 especially within the Caryophyllaceae and Polygonaceae contrasted with extensive  
324 diversification in the succulent lineages (especially Aizoaceae and Cactaceae) found in relatively  
325 dry and warm environments.

326  
327 **Diversification.** —Significant shifts in diversification were detected in most major clades (Table  
328 4, Fig. 1). The results from diversification analyses on the maximum likelihood tree and  
329 bootstrap tree set are generally congruent with each other. However, there are discrepancies (Fig.  
330 1). The bootstrap set recovered many shifts in Polygonaceae, the carnivorous clade,  
331 Caryophyllaceae, some shifts within Cactaceae, phytolaccoids, and Amaranthaceae.  
332 Disagreements on the existence and placement of shifts are primarily within Portulacineae,  
333 Aizoaceae, and Amaranthaceae. Overall, MEDUSA detected 27 increases in diversification rate  
334 using the ML tree and 16 increases using the bootstrap trees. Given the relative lack of support of  
335 some of the branches in the phylogeny, we find the MEDUSA results on the set of bootstrapped

336 trees to be the most conservative while the ML results are suggestive but not definitive of  
337 diversification shifts.

338

339 **Duplications, diversification, and climate.** —WGD analyses show thirteen putative WGDs that  
340 can be mapped to clades (i.e., involve more than 1 taxon in the dataset; Table 3 and Figs. 1-3).  
341 Many of these are found in early diverging lineages as opposed to nested deep within families,  
342 though there are WGDs identified in *Amaranthus* and *Claytonia*. We also find evidence of nested  
343 WGDs as within the phytolaccoids and Portulacineae. In addition to these deeper WGDs, there  
344 are larger numbers of more recent WGDs that are present in Ks plots but cannot be mapped to a  
345 clade (Yang *et al.*, submitted). By sampling more extensively, Yang *et al.* (submitted) and  
346 Walker *et al.* (2017) found additional WGD events within the Caryophyllales. While it is  
347 possible, this is unlikely to be phenomenon specific to the Caryophyllales and we will likely find  
348 additional WGDs events in other lineages as more effort is placed on denser taxon sampling  
349 using genomes and transcriptomes. We do not explore WGDs that can only be mapped to one tip  
350 any further and more discussion of specific results related to the WGDs themselves can be found  
351 in Yang *et al.* (submitted) and Walker *et al.* (2017).

352 To better examine whether WGDs coincide with diversification rate shifts, increases and  
353 decreases, or notable changes in climate tolerance, we mapped WGDs onto the large phylogenies  
354 and summarized the number of species and climate information for each clade (Tables 3-4, Figs.  
355 1-3). Some WGD events are associated with synchronous diversification events. For example,  
356 within Nyctaginaceae, a WGD event occurs on the same branch (leading to Tribe Nyctagineae;  
357 Douglas and Spellenberg, 2010) as an increase in diversification rate in both the ML tree and the  
358 bootstrapped dataset (Fig. 1, dup:1 div:n). These events are further associated with a shift in life  
359 history and niche from an ancestral woody habit in the tropics to the largely herbaceous, arid-  
360 adapted temperate Nyctagineae. This is also the case for *Amaranthus* (Fig. 1, dup:5 div:x). Other  
361 coincident diversification and WGD events in the Droseraceae and Nepenthaceae are only  
362 supported by the ML tree. Although these correlated events may, in fact, be accurate, we will  
363 reserve more comments for when these are more confidently resolved. Other than these  
364 simultaneous shifts, and excepting one diversification shift at the base of the MRCA of  
365 Nyctaginaceae+Cactaceae, all other shifts in diversification occur more recently than WGD  
366 events. Tank *et al.* (2015) suggested that this lagging pattern may be common at the broader

367 angiosperm scale, though the expected distance of the diversification shift from the WGD event  
368 was not specified (this is discussed more below). In the results presented here, some  
369 diversification events occur shortly after the WGD event, such as within the Amaranthaceae  
370 (dup: 6) and Portulacineae (dup: 4). For others, it is difficult to determine whether the  
371 diversification events that occur after the WGD events are significantly close to the WGD to  
372 warrant suggestion of an association (e.g., dup: 7, dup: 10, dup: 8). More description of a model  
373 that would generate a null expectation would be necessary to determine what is “close enough”  
374 (see discussion below).

375 Many of the other inferred lineage diversification rate shifts are associated with very  
376 recent, rapid radiations within genera such as those documented within *Commicarpus*  
377 (Nyctaginaceae), *Dianthus* (Caryophyllaceae), *Cerastium* (Caryophyllaceae), *Arenaria*  
378 (Caryophyllaceae), and *Salicornia* (Amaranthaceae), to name a few (Table 4). Although  
379 polyploids were reported in these clades, we are unable to pinpoint the phylogenetic location of  
380 any WGD with our current taxon sampling (e.g., *Dianthus*; Carolin, 1954; Weiss *et al.* 2002).  
381 Increased sampling of transcriptomes and genomes will shed more light in these areas. While we  
382 only find a few WGDs that coincide well with diversification rate shifts, it is important to note  
383 that the uncertainty in the phylogenies makes it difficult to map anything but the strongest  
384 diversification signals. This discrepancy can be seen in the difference between the number of  
385 events supported by the ML analyses and those supported by the bootstrap analyses. It is possible  
386 that additional sequence data will improve phylogenetic resolution and confidence, and that  
387 consequently additional diversification events will emerge.

388 Equally interesting to the few WGD events associated directly with diversification are the  
389 WGD events associated with general shifts in climate tolerance. WGDs in the Polygonaceae,  
390 Caryophyllaceae, Montiaceae, and the Tribe Nyctagineae appear to be associated with movement  
391 into colder environments (Figs. 1-2 and Figs. S2-S3). Species arising after the WGD within the  
392 Amaranthaceae occupy wetter environments than the sister clade. The WGDs within the  
393 carnivorous plants are also associated with shifts in environment as *Nepenthes* are found in very  
394 wet environments and the Droseraceae are found in somewhat drier environments, at least  
395 comparatively. However, in these cases, perhaps the development of the wide array of  
396 morphologies associated with carnivory, apart from *Drosophyllum*, is more obviously associated  
397 with the WGD (Walker *et al.*, 2017).

398           While these qualitative assessments suggest potential correlations of shift in the climate  
399 occupied and WGDs, more specific and direct comparisons are necessary to quantify the extent  
400 of the shifts. For many of the clades experiencing WGD, a direct comparison with a sister clade  
401 is difficult because the sister may consist of a single species, another clade with WGD, or  
402 another complication. For example, there are WGDs at the base of both Polygonaceae and  
403 Plumbaginaceae as well as Nepenthaceae and Droseraceae. However, we made direct  
404 comparison of five duplicated lineages (see Fig. 3) in both means (i.e., character contrasts  
405 between sister clades) and variances (rate of Brownian motion) of climatic variables. In each  
406 case, the duplicated lineage occupies a colder mean annual temperature. This is also the case  
407 with the nested WGDs of Portulacineae and the Tribe Nyctagineae. Of course, we do not suggest  
408 that all WGDs are associated with a shift to a colder climate. While such a pattern may exist in  
409 some groups such as Caryophyllaceae, we emphasize the observation that there is a shift in the  
410 climate occupied rather than the direction of the shift. Mean annual precipitation is not as clear  
411 with some clades occupying a higher precipitation and some occupying lower precipitation.  
412 Perhaps the best summary of climatic niche is the principal components of all the climatic  
413 variables. Here, while the shift in units is less easily interpreted, duplicated clades occupy  
414 different niches than sister lineages. This generally supports the hypothesis that WGD events are  
415 associated with adaptations, in this case, that are associated with shifts in climatic niches. This  
416 necessitates further examination in other angiosperm clades.

417           The rates of niche evolution show more complicated patterns. While some clades, such as  
418 the Portulacineae, show significant increase in a rate of niche evolution as compared to the sister  
419 clade (e.g., MAT), no clear pattern emerges across all comparisons. There are other shifts in rate  
420 such as with MAT and MAP in the Nyctaginaceae and Montiaceae, but these are not as strong as  
421 the pattern of climate itself discussed above.

422           With each of these patterns presented here, it is important to consider them in the context  
423 of uncertainty, both inherent in the biological processes that generate the phylogeny and in the  
424 analyses associated with large scale datasets. These large phylogenies and datasets allow for  
425 more thorough examination of the clades, but uncertainty makes precise mapping of weaker  
426 signals difficult. As mentioned above, this is demonstrated by both the mapping of  
427 diversification events and duplications. Furthermore, the comparisons of the sister clades for  
428 climatic niche analyses assumes accurate identification of sister lineages. Increasing taxon

429 sampling may help, but additional sequence data and specimen data for phylogenetic analyses,  
430 WGD mapping analyses, and climate niche characterization will surely improve our precision in  
431 these investigations.

432         What emerges from these analyses of WGD, diversification, and climate? It would appear  
433 as though, perhaps not unexpectedly, the patterns are complex and mixed. Some WGD are  
434 associated directly with diversification events, some WGD are associated with shifts in climate  
435 tolerance, some WGD are coincident with shifts in rates of niche evolution, and still other WGD  
436 are associated with known adaptations (carnivory, habit shifts associated with montane habitats,  
437 etc.). Some diversification shifts follow WGD events. However, it is unclear whether these  
438 events are linked or correlated and, if so, if they are correlated more with diversification than an  
439 additional adaptation or other evolutionary pattern or process. As data increase in these groups  
440 and as confidence increases in the phylogenetic relationships as well as the placement of both  
441 diversification and WGD events, we will be able to better address these questions. However, at  
442 least for the Caryophyllales, it does not appear as though diversification is tightly linked with  
443 WGD. Instead, for the clades that can be tested, we find shifts in climate correspond well to  
444 WGD.

445  
446 **Suggestions for moving forward.** —WGD are almost certainly one of the dominant processes  
447 that contribute to major evolutionary events within plant lineages. This may be in the form of  
448 increased diversification, development of novel traits, adaptation to new environments, and many  
449 other events (e.g., Schubert and Vu, 2016; Clavijo et al. 2017). However, for several reasons,  
450 these events (i.e., WGD and other evolutionary events) may not occur simultaneously. In fact,  
451 there may be little to no expectation for the events to occur simultaneously (e.g., Donoghue,  
452 2005; Donoghue and Sanderson, 2015; Tank *et al.*, 2015). In any case, however, more precise  
453 expectations and null models need to be developed to allow for reasonable tests of the  
454 correlations among these events. For example, there may be shifts in diversification that follow a  
455 WGD, but is it close enough, or frequent enough to infer that the two events are related? Is  
456 correlation possible or identifiable if, as is expected, intervening lineages have gone extinct?  
457 Furthermore, more precise connections should be made to the biology of speciation and genome  
458 WGDs to better determine why, specifically, WGDs would be expected to correspond with any  
459 diversification pattern instead of adaptations, which may or may not correspond with increases or

460 decreases in speciation. While still challenging, investigating the fate of and patterns of selection  
461 within individual genes (e.g., subfunctionalization and neofunctionalization) may shed light into  
462 the genomic basis of post-WGD and possibly allow for more concrete expectations for  
463 diversification. With the availability of genomes and transcriptomes, this is now beginning to  
464 become a possibility (e.g., Brockington et al., 2015, Walker *et al.*, 2017). Only when these  
465 suggestions are linked to more specific biological hypotheses will we be able to better  
466 understand the ultimate impact of WGD in plant evolution.

467

#### 468 **Acknowledgements**

469 We thank Gregory Stull, Oscar Vargas, Ning Wang, Sonia Ahluwalia, Jordan Shore, Lijun Zhao,  
470 Alex Taylorm, and Drew Larson for helpful discussion on the manuscript. The authors thank  
471 Hilda Flores, Helga Ochoterena, Tom Wendt and the staff at the Plant Resources Center at the  
472 University of Texas at Austin, the Lyon Arboretum, David Anderson, John Brittnacher, Anna  
473 Brunner, Joseph Charboneau, Arianna Goodman, Heather-Rose Kates, Patricia Hernández  
474 Ledesma, Lucas Majure, Nidia Mendoza, Michael Powell, Rick Ree, Carl Rothfels, Flora Samis,  
475 Jeffrey Sanders, Elizabeth Saunders, Rich Spellenberg, Greg Stull, Mats Thulin, Erin Tripp, and  
476 Sophia Weinmann for help with obtaining material. This work was supported by NSF DEB  
477 awards 1352907 and 1354048.

478

#### 479 **Author contributions**

480 S.A.S., J.F.W., Y.Y., M.J.M., C.P.-F., and S.F.B. designed research. S.A.S., J.W.B., C.P.F., and  
481 Y.Y. analyzed the data. S.A.S. led the writing. All authors read and contributed to the  
482 manuscript.

483

#### 484 **References**

485 **Alfaro ME, Santini F, Brock C, Alamillo H, Dornburg A, Rabosky DL, Carnevale G,**  
486 **Harmon LJ. 2009.** Nine exceptional radiations plus high turnover explain species  
487 diversity in jawed vertebrates. *Proceedings of the National Academy of Sciences, USA*  
488 **106:** 13410–13414.



- 489 **Angiosperm Phylogeny Group**. 2016. An update of the Angiosperm Phylogeny Group  
490 classification for the orders and families of flowering plants: APG IV. *Botanical Journal*  
491 *of the Linnean Society* 181: 1-20.
- 492 **Arakaki M, Christin PA, Nyffeler R, Lendel A, Eggli U, Ogburn RM, Spriggs E, Moore**  
493 **MJ, Edwards EJ. 2011.** Contemporaneous and recent radiations of the world's major  
494 succulent plant lineages. *Proceedings of the National Academy of Sciences, USA* **108**:  
495 8379–8384.
- 496 **Arrigo N, Barker MS. 2012.** Rarely successful polyploids and their legacy in plants genomes.  
497 *Current Opinion in Plant Biology* **15**: 140–146.
- 498 **Barker MS, Vogel H, Schranz ME. 2009.** Paleopolyploidy in the Brassicales: Analyses of  
499 the *Cleome* transcriptome elucidate the history of genome duplications in *Arabidopsis*  
500 and other Brassicales. *Genome Biology and Evolution* **1**: 391–399.
- 501 **Barker MS, Husband BC, Pires JC. 2016.** Spreading Winge and flying high: The evolutionary  
502 importance of polyploidy after a century of study. *Am. J. Bot.* **103**: 1139-1145.
- 503 **Bell CD, Soltis DE, Soltis PS. 2010.** The age and diversification of the angiosperms re-revisited.  
504 *American Journal of Botany* **97**: 1296–1303.
- 505 **Brochmann C, Brysting AK, Alsos IG, Borgen L, Grundt HH, Scheen AC, Elven R. 2004.**  
506 Polyploidy in arctic plants. *Biological Journal of the Linnean Society* **82**: 521–536.
- 507 **Brockington SF, Alexandre R, Ramdial J, Moore MJ, Crawley S, Dhingra A, Hilu K, Soltis**  
508 **DE, Soltis PS. 2009.** Phylogeny of the Caryophyllales *sensu lato*: revisiting hypotheses  
509 on pollination biology and perianth differentiation in the core Caryophyllales.  
510 *International Journal of Plant Sciences* **170**: 627–643.
- 511 **Brockington SF, Yang Y, Gandia-Herrero F, Covshoff S, Hibberd JM, Sage RF, Wong GK,**  
512 **Moore MJ, Smith SA. 2015.** Lineage-specific gene radiations underlie the evolution of  
513 novel betalain pigmentation in Caryophyllales. *New Phytologist* **207**: 1170–1180.
- 514 **Brown JW, Walker JF, Smith SA. 2017.** phyx: Phylogenetic tools for Unix. *Bioinformatics*  
515 **btx063**.
- 516 **Burnham KP, Anderson DR. 2003.** Model Selection and Multimodel Inference: A Practical  
517 Information-Theoretic Approach. Springer, New York.
- 518 **Carolin RC. 1954.** Stomatal size, density and morphology in the genus *Dianthus*. *Kew Bulletin*  
519 **9**: 251-258.

- 520 **Cevallos-Ferriz SRS, Estrada-Ruiz E, Perez-Hernandez BR. 2008.** Phytolaccaceae  
521 infructescence from Cerro del Pueblo formation, upper Cretaceous (late Campanian),  
522 Coahuila, Mexico. *American Journal of Botany* **95**: 77–83.
- 523 **Chase MW, Christenhusz MJM, Fay MF, Byng JW, Judd WS, Soltis DE, Mabberley DJ,**  
524 **Sennikov AN, Soltis PS, Stevens PF. 2016.** An update of the Angiosperm Phylogeny  
525 Group classification for the orders and families of flowering plants: APG IV. *Botanical*  
526 *Journal Linnean Society* **181**: 1-20.
- 527 **Clavijo BJ, Venturini L, Schudoma C, Accinelli GG, Kaithakottil G, Wright J, Borrill P,**  
528 **Kettleborough G, Heavens D, Chapman H, Lipscombe J, Barker T, Lu FH,**  
529 **McKenzie N, Raats D, Ramirez-Gonzalez RH, Coince A, Peel N, Percival-Alwyn L,**  
530 **Duncan O, Trösch J, Yu G, Bolser DM, Namaati G, Kerhornou A, Spannagl M,**  
531 **Gundlach H, Haberer G, Davey RP, Fosker C, Palma FD, Phillips A, Millar AH,**  
532 **Kersey PJ, Uauy C, Krasileva KV, Swarbreck D, Bevan MW, Clark MD. 2017.** An  
533 improved assembly and annotation of the allohexaploid wheat genome identifies  
534 complete families of agronomic genes and provides genomic evidence for chromosomal  
535 translocations. *Genome Research* doi: 10.1101/gr.217117.116
- 536 **Comai L. 2005.** The advantages and disadvantages of being polyploid. *Nature Review Genetics*  
537 **6**: 836–846.
- 538 **Degreef JD. 1997.** Fossil *Aldrovanda*. *Carnivorous Plant Newsletter* **26**: 93–97. Available at:  
539 [http://www.carnivorousplants.org/cpn/articles/CPNv26n3p93\\_97.pdf](http://www.carnivorousplants.org/cpn/articles/CPNv26n3p93_97.pdf)  
540 [http://www.carnivorousplants.org/cpn/articles/CPNv26n3p93\\_97.pdf](http://www.carnivorousplants.org/cpn/articles/CPNv26n3p93_97.pdf)  
541 [http://www.carnivorousplants.org/cpn/articles/CPNv26n3p93\\_97.pdf](http://www.carnivorousplants.org/cpn/articles/CPNv26n3p93_97.pdf)
- 541 **Dodsworth S, Chase M, Leitch A. 2016.** Is post-polyploidization diploidization the key to the  
542 evolutionary success of angiosperms. *Botanical Journal of the Linnean Society* **180**:  
543 1095–8339.
- 544 **Dohm JC, Lange C, Holtgräwe D, Sörensen TR, Borchardt D, Schulz B, Lehrach H,**  
545 **Weisshaar B, Himmelbauer H. 2012.** Palaeohexaploid ancestry for Caryophyllales  
546 inferred from extensive gene-based physical and genetic mapping of the sugar beet  
547 genome (*Beta vulgaris*). *The Plant Journal* **70**: 528–40.
- 548 **Donoghue MJ. 2005.** Key innovations, convergence, and success: macroevolutionary lessons  
549 from plant phylogeny. *Paleobiology* **31**:77-93.

- 550 **Donoghue MJ, Sanderson MJ. 2015.** Confluence, synnovation, and depauperons in plant  
551 diversification. *New Phyt.* **207**:260-274.
- 552 **Douglas N, Spellenberg R. 2010.** A new tribal classification of Nyctaginaceae. *Taxon* **59**: 905–  
553 910.
- 554 **Doyle JJ, Doyle JL. 1987.** A rapid DNA isolation procedure for small quantities of fresh leaf  
555 tissue. *Phytochemical Bulletin* **19**: 11-15.
- 556 **Edger PP, Heidel-Fischer HM, Bekaert M, Rota J, Glöckner G, Platts AE, Heckel DG, Der  
557 JP, Wafula EK, Tang M, Hofberger JA. 2015.** The butterfly plant arms-race escalated  
558 by gene and genome duplications. *Proceedings of the National Academy of Sciences,*  
559 *USA* **112**: 8362–8366.
- 560 **Friis EM, Crane P, Pedersen KR. 2011.** Early Flowers and Angiosperm Evolution. Cambridge.
- 561 **Guindon S, Dufayard J, Lefort V, Anisimova M, Hordijk W, Gascuel O. 2010.** New  
562 algorithms and methods to estimate maximum-likelihood phylogenies: assessing the  
563 performance of PhyML 3.0. *Systematic Biology* **59**: 307–321.
- 564 **Huang, CH, Zhang C, Liu M, Hu Y, Gao T, Qi J, Hong Ma. 2016.** Multiple Polyploidization  
565 Events across Asteraceae with Two Nested Events in the Early History Revealed by  
566 Nuclear Phylogenomics. *Mol Biol Evol.* **33**: 2820-2835.
- 567 **Jordan GJ, Macphail MK. 2003.** A middle-late Eocene inflorescence of Caryophyllaceae from  
568 Tasmania, Australia. *American Journal of Botany* **90**: 761–768.
- 569 **Levin DA. 1983.** Polyploidy and novelty in flowering plants. *American Naturalist* **122**: 1–25.
- 570 **Levin DA. 2002.** The Role of Chromosomal Change in Plant Evolution. Oxford University  
571 Press: New York.
- 572 **McKain MR, Tang H, McNeal JR, Ayyampalayam S, Davis JI, dePamphilis CW, Givnish  
573 TJ, Pires JC, Stevenson DW, Leebens-Mack JH. 2016.** A Phylogenomic Assessment  
574 of Ancient Polyploidy and Genome Evolution across the Poales. *Genome Biol. Evol.* **8**:  
575 1150-1164.
- 576 **Mayrose I, Zhan SH, Rothfels CJ, Magnuson-Ford K, Barker MS, Rieseberg LH, Otto SP.  
577 2011.** Recently formed polyploid plants diversify at lower rates. *Science* **333**: 1257.
- 578 **Miller JS, Venable DL. 2000.** Polyploidy and the evolution of gender dimorphism in plants.  
579 *Science* **289**: 2335–2338.

- 580 **Moore MJ, Soltis PS, Bell CD, Burleigh JG, Soltis DE. 2010.** Phylogenetic analysis of 83  
581 plastid genes further resolves the early diversification of eudicots. *Proceedings of the*  
582 *National Academy of Sciences, USA* **107**: 4623–4628.
- 583 **Nei M, Gojobori T. 1986.** Simple methods for estimating the numbers of synonymous and  
584 nonsynonymous nucleotide substitutions. *Molecular Biology and Evolution* **3**: 418–426.
- 585 **Nichols DJ, Traverse A. 1971.** Palynology, petrology, and depositional environments of some  
586 early Tertiary lignites in Texas. *Geoscience and Man* **3**: 37–48.
- 587 **Ocampo G, Columbus T. 2010.** Molecular phylogenetics of suborder Cactineae  
588 (Caryophyllales), including insights into photosynthetic diversification and historical  
589 biogeography. *Am. J. Bot.* **97**: 1827-1847.
- 590 **Otto SP, Whitton J. 2000.** Polyploid incidence and evolution. *Annual Review of Genetics* **34**:  
591 401–437.
- 592 **Pennell MW, Eastman JM, Slater GJ, Brown JW, Uyeda JC, Fitzjohn RG, Alfaro ME,**  
593 **Harmon LJ. 2014.** geiger v2.0: an expanded suite of methods for fitting  
594 macroevolutionary models to phylogenetic trees. *Bioinformatics* **30**: 2216–2218.
- 595 **Puttick, MN, Clark J., Donoghue P. 2015.** Size is not everything: rates of genome size  
596 evolution, not C-value, correlate with speciation in angiosperms. *Proc. Roy. Soc. B.* **282**:  
597 20152289.
- 598 **Sanderson MJ. 2003.** r8s: inferring absolute rates of molecular evolution and divergence times  
599 in the absence of a molecular clock. *Bioinformatics* **19**: 301–302.
- 600 **Schubert I, Vu GTH. 2016.** Genome Stability and Evolution: Attempting a Holistic View.  
601 *Trends in Plant Sciences* **21**: 749-757.
- 602 **Schuster TM, Setaro SD, Kron KA. 2013.** Age Estimates for the Buckwheat Family  
603 Polygonaceae Based on Sequence Data Calibrated by Fossils and with a Focus on the  
604 Amphi-Pacific *Muehlenbeckia*. *Plos ONE* **8**(4): e61261.
- 605 **Smith SA, Beaulieu JM, Donoghue MJ. 2009.** Mega-phylogeny approach for comparative  
606 biology: an alternative to supertree and supermatrix approaches. *BMC Evolutionary*  
607 *Biology* **9**: 37.
- 608 **Smith SA, Beaulieu JM, Stamatakis A, Donoghue MJ.** Understanding angiosperm  
609 diversification using small and large phylogenetic trees. *American Journal of Botany* **98**:  
610 404–414.

- 611 **Smith SA, Donoghue MJ.** 2008. Rates of molecular evolution are linked to life history in  
612 flowering plants. *Science* 322: 86–89.
- 613 **Smith SA, O’Meara BC.** 2012. treePL: divergence time estimation using penalized likelihood  
614 for large phylogenies. *Bioinformatics* 28: 2689–2690.
- 615 **Smith SA, Moore MJ, Brown JW, Yang Y.** 2015. Analysis of phylogenomic datasets reveals  
616 conflict, concordance, and gene duplications with examples from animals and plants.  
617 *BMC Evolutionary Biology* 15: 150.
- 618 **Soltis PS, Soltis DS.** 2000. The role of genetic and genomic attributes in the success of  
619 polyploids. *Proceedings of the National Academy of Sciences, USA* 97: 7051–7057.
- 620 **Soltis DE, Smith SA, Cellinese N, Wurdack KJ, Tank DC, Brockington SF, Refulio-  
621 Rodriguez NF, Walker JB, Moore MJ, Carlswald BS, Bell CD.** 2011. Angiosperm  
622 phylogeny: 17 genes, 640 taxa. *American Journal of Botany* 98: 704–730.
- 623 **Soltis PS, Liu X, Marchant DB, Visger CJ, Soltis DE.** 2014. Polyploidy and novelty:  
624 Gottlieb’s legacy. *Philosophical Transactions of the Royal Society of London B:  
625 Biological Sciences* 369: 20130351.
- 626 **Stamatakis A.** 2014. RAxML version 8: a tool for phylogenetic analysis and post-analysis of  
627 large phylogenies. *Bioinformatics* 30: 1312–1313.
- 628 **Storchová Z, Breneman A, Cande J, Dunn J, Burbank K, O’toole E, Pellman D.** 2006.  
629 Genome-wide genetic analysis of polyploidy in yeast. *Nature* 443: 541.
- 630 **Suyama M, Torrents D, Bork P.** 2006. PAL2NAL: robust conversion of protein sequence  
631 alignments into the corresponding codon alignments. *Nucleic Acids Research* 34 (suppl  
632 2): W609–W612.
- 633 **Tank DC, Eastman JM, Pennell MW, Soltis PS, Soltis DE, Hinchliff CE, Brown JW, Sessa  
634 EB, Harmon LJ.** 2015. Nested radiations and the pulse of angiosperm diversification:  
635 increased diversification rates often follow whole genome duplications. *New Phytologist*  
636 207: 454–467.
- 637 **Thulin M, Moore AJ, El-Seedi H, Larsson A, Christin P-A, Edwards EJ.** 2016. Phylogeny  
638 and generic delimitation in Molluginaceae, new pigment data in Caryophyllales, and the  
639 new family Corbichoniaceae. *Taxon* 65: 775–793.

- 640 **Valente LM, Britton AW, Powell MP, Papadopulos AST, Burgoyne PM, Savolainen V.**  
641 **2014.** Correlates of hyperdiversity in southern African ice plants (Aizoaceae). *Botanical*  
642 *Journal of the Linnean Society Linnean Society of London.* **174**:110-129.
- 643 **Walker JF, Yang Y, Moore MJ, Mikenas J, Timoneda A, Brockington SF, Smith SA. 2017.**  
644 Widespread paleopolyploidy, gene tree conflict, and recalcitrant relationships among the  
645 carnivorous Caryophyllales. *bioRxiv*: 115741.
- 646 **Weiss H, Dobes C, Schneeweiss GM, Greimler J. 2002.** Occurrence of tetraploid and  
647 hexaploid cytotypes between and within populations in *Dianthus* sect. *Plumaria*  
648 (Caryophyllaceae). *New Phyto.* **156**: 85-94.
- 649 **Wood TE, Takebayashi N, Barker MS, Mayrose I, Greenspoon PB, Rieseberg LH. 2009.**  
650 The frequency of polyploid speciation in vascular plants. *Proceedings of the National*  
651 *Academy of Sciences, USA* **106**: 13875–13879.
- 652 **Yang Y, Moore MJ, Brockington SF, Soltis DE, Wong GK-S, Carpenter EJ, Zhang Y,**  
653 **Chen L, Yan Z, Xie Y, Sage RF. 2015.** Dissecting molecular evolution in the highly  
654 diverse plant clade Caryophyllales using transcriptome sequencing. *Molecular Biology*  
655 *and Evolution* **32**: 2001–2014.
- 656 **Yang Z. 2007.** PAML 4: phylogenetic analysis by maximum likelihood. *Molecular Biology and*  
657 *Evolution* **24**: 1586–1591.
- 658 **Zetter R, Hofmann CC, Draxler I, Durango de Cabrera J, Del MVerger M, Vervoorst F.**  
659 **1999.** A rich middle Eocene microflora at Arroyo de los Mineros, near Cañadón Beta, NE  
660 Tierra del Fuego province, Argentina. *Abhandlungen der Geologischen Bundesanstalt*  
661 **56**: 439–460.  
662

663 **Tables**

664 **Table 1** Voucher information and GenBank accession numbers for newly reported plastid *matK*  
 665 sequences. Families follow APG IV (Angiosperm Phylogeny Group 2016).

| Family          | Taxon                                                                     | Voucher specimen (Herbarium acronym)                                              | Collection locality                    | NCBI accession number |
|-----------------|---------------------------------------------------------------------------|-----------------------------------------------------------------------------------|----------------------------------------|-----------------------|
| Achatocarpaceae | <i>Achatocarpus gracilis</i><br>H.Walter                                  | Silvia H. Salas<br>Morales et al. 5608<br>(TEX)                                   | Mexico:<br>Oaxaca                      | KY952292              |
| Achatocarpaceae | <i>Phaulothamnus<br/>spinescens</i> A.Gray                                | Michael J. Moore et<br>al. 976 (OC)                                               | United States:<br>Texas                | KY952477              |
| Achatocarpaceae | <i>Phaulothamnus<br/>spinescens</i> A.Gray                                | William R. Carr<br>27176 (TEX)                                                    | United States:<br>Texas                | KY952478              |
| Amaranthaceae   | <i>Allenrolfea occidentalis</i><br>(S.Watson) Kuntze                      | Michael J. Moore 474<br>(OC)                                                      | United States:<br>Texas                | KY952314              |
| Amaranthaceae   | <i>Alternanthera<br/>caracasana</i> Kunth                                 | Michael J. Moore<br>1808 (OC)                                                     | United States:<br>Texas                | KY952319              |
| Amaranthaceae   | <i>Amaranthus cruentus</i> L.                                             | Michael J. Moore 356<br>(OC)                                                      | United States:<br>Ohio<br>(cultivated) | KY952320              |
| Amaranthaceae   | <i>Amaranthus</i> sp.                                                     | Michael J. Moore<br>1801 (OC)                                                     | United States:<br>Texas                | KY952321              |
| Amaranthaceae   | <i>Amaranthus</i> sp.                                                     | Michael J. Moore<br>2186 (OC)                                                     | United States:<br>Ohio                 | KY952322              |
| Amaranthaceae   | <i>Amaranthus</i> sp.                                                     | Michael J. Moore<br>2187 (OC)                                                     | United States:<br>Illinois             | KY952323              |
| Amaranthaceae   | <i>Atriplex prosopidum</i><br>I.M.Johnst.                                 | Hilda Flores Olvera<br>et al. 1658 (MEXU)                                         | Mexico:<br>Coahuila                    | KY952340              |
| Amaranthaceae   | <i>Atriplex</i> sp.                                                       | Michael J. Moore<br>1689 (OC)                                                     | United States:<br>Texas                | KY952338              |
| Amaranthaceae   | <i>Atriplex</i> sp.                                                       | Michael J. Moore<br>1699 (OC)                                                     | United States:<br>Texas                | KY952339              |
| Amaranthaceae   | <i>Celosia argentea</i> L. var.<br><i>plumosa</i>                         | Michael J. Moore 359<br>(OC)                                                      | United States:<br>Ohio<br>(cultivated) | KY952359              |
| Amaranthaceae   | <i>Charpentiera ovata</i><br>Gaudich. var. <i>ovata</i>                   | Flora K. Samis 7<br>(Lyon Arboretum<br>living collection,<br>accession 2011.0034) | United States:<br>Hawaii               | KY952360              |
| Amaranthaceae   | <i>Charpentiera tomentosa</i><br>Sohmer var.<br><i>maakuaensis</i> Sohmer | Flora K. Samis 6<br>(Lyon Arboretum<br>living collection,<br>accession 88.0141)   | United States:<br>Hawaii               | KY952361              |
| Amaranthaceae   | <i>Chenopodium album</i> L.                                               | Michael J. Moore 344<br>(OC)                                                      | United States:<br>Ohio                 | KY952362              |
| Amaranthaceae   | <i>Gossypianthus<br/>lanuginosus</i> (Poir.) Moq.                         | Michael J. Moore<br>1807 (OC)                                                     | United States:<br>Texas                | KY952408              |
| Amaranthaceae   | <i>Guilleminea densa</i>                                                  | Michael J. Moore et                                                               | Mexico:                                | KY952412              |

|                  |                                                                                                   |                                                                           |                            |          |
|------------------|---------------------------------------------------------------------------------------------------|---------------------------------------------------------------------------|----------------------------|----------|
|                  | (Humb. & Bonpl. ex Schult.) Moq.                                                                  | al. 2445 (OC)                                                             | Chihuahua                  |          |
| Amaranthaceae    | <i>Kali tragus</i> (L.) Scop.                                                                     | Michael J. Moore 453 (OC)                                                 | United States: Texas       | KY952506 |
| Amaranthaceae    | <i>Nototrichium divaricatum</i> D.H.Lorence                                                       | Flora K. Samis 3 (Lyon Arboretum living collection, accession 96.0036 #3) | United States: Hawaii      | KY952468 |
| Amaranthaceae    | <i>Nototrichium humile</i> Hillebr.                                                               | Flora K. Samis 2 (Lyon Arboretum living collection, accession 2001-0254)  | United States: Hawaii      | KY952469 |
| Amaranthaceae    | <i>Suaeda jacoensis</i> I.M.Johnst.                                                               | Hilda Flores Olvera et al. 1662 (MEXU)                                    | Mexico: Coahuila           | KY952514 |
| Amaranthaceae    | <i>Suaeda jacoensis</i> I.M.Johnst.                                                               | Michael J. Moore et al. 2617 (OC)                                         | Mexico: Nuevo Leon         | KY952515 |
| Amaranthaceae    | <i>Suaeda mexicana</i> (Standl.) Standl.                                                          | Hilda Flores Olvera et al. 1654 (MEXU)                                    | Mexico: Coahuila           | KY952516 |
| Amaranthaceae    | <i>Tidestromia lanuginosa</i> (Nutt.) Standl.                                                     | Michael J. Moore 1128 (OC)                                                | United States: Texas       | KY952521 |
| Amaranthaceae    | <i>Zuckia brandegeei</i> (A.Gray) S.L.Welsh & Stutz var. <i>plummeri</i> (Stutz & S.C.Sand.) Dorn | Joseph L. M. Charboneau 9672 (RM)                                         | United States: Colorado    | KY952528 |
| Cactaceae        | <i>Leuenbergeria quisqueyana</i> (Alain) Lodé                                                     | Flora K. Samis 11 (Lyon Arboretum living collection, accession 2000.0281) | United States: Hawaii      | KY952473 |
| Caryophyllaceae  | <i>Moehringia macrophylla</i> (Hook.) Fenzl                                                       | Arianna Goodman 1 (OC)                                                    | United States: Oregon      | KY952464 |
| Caryophyllaceae  | <i>Paronychia lundellorum</i> Torr. & A.Gray                                                      | William R. Carr 17607 (MEXU)                                              | United States: Texas       | KY952472 |
| Caryophyllaceae  | <i>Saponaria officinalis</i> L.                                                                   | Michael J. Moore et al. 1819 (OC)                                         | United States: Indiana     | KY952507 |
| Caryophyllaceae  | <i>Schiedea kaalae</i> Wawra                                                                      | Flora K. Samis 5 (Lyon Arboretum living collection, accession 92.0513)    | United States: Hawaii      | KY952509 |
| Caryophyllaceae  | <i>Spergularia salina</i> J.Presl & C.Presl                                                       | Michael J. Moore 1693 (OC)                                                | United States: Texas       | KY952512 |
| Didiereaceae     | <i>Alluaudia ascendens</i> (Drake) Drake                                                          | Michael J. Moore 1645                                                     | United States (cultivated) | KY952318 |
| Dioncophyllaceae | <i>Triphyophyllum peltatum</i> (Hutch. & Dalziel) Airy Shaw                                       | Carel C. H. Jongkind et al. 7136 (WAG)                                    | Liberia                    | KY952524 |
| Droseraceae      | <i>Drosera burmannii</i> Vahl cv. Pilliga Red                                                     | Michael J. Moore 1814 (OC)                                                | United States (cultivated) | KY952400 |
| Droseraceae      | <i>Drosera peltata</i> Thunb.                                                                     | Michael J. Moore                                                          | Australia:                 | KY952401 |



|                 |                                                                     |                                         |                               |          |
|-----------------|---------------------------------------------------------------------|-----------------------------------------|-------------------------------|----------|
|                 |                                                                     | 1817 (OC)                               | Tasmania<br>(cultivated)      |          |
| Droseraceae     | <i>Drosera regia</i> Stephens                                       | Michael J. Moore<br>1812 (OC)           | United States<br>(cultivated) | KY952402 |
| Drosophyllaceae | <i>Drosophyllum<br/>lusitanicum</i> (L.) Link                       | Michael J. Moore<br>1816 (OC)           | United States<br>(cultivated) | KY952403 |
| Frankeniaceae   | <i>Frankenia gypsophila</i><br>I.M.Johnst.                          | Michael J. Moore et<br>al. 1880 (OC)    | Mexico:<br>Nuevo Leon         | KY952406 |
| Microteaceae    | <i>Microtea debilis</i> Sw.                                         | Manuel Rimachi<br>11128 (TEX)           | Peru: Loreto                  | KY952415 |
| Montiaceae      | <i>Claytonia sibirica</i> L.                                        | Arianna Goodman 2<br>(OC)               | United States:<br>Oregon      | KY952363 |
| Montiaceae      | <i>Phemeranthus<br/>parviflorus</i> (Nutt.) Kiger                   | Michael J. Moore et<br>al. 2214 (OC)    | United States:<br>New Mexico  | KY952479 |
| Nyctaginaceae   | <i>Abronia angustifolia</i><br>Greene                               | Michael J. Moore et<br>al. 2063 (OC)    | Mexico:<br>Coahuila           | KY952281 |
| Nyctaginaceae   | <i>Abronia angustifolia</i><br>Greene                               | Michael J. Moore et<br>al. 896 (OC)     | United States:<br>New Mexico  | KY952282 |
| Nyctaginaceae   | <i>Abronia bigelovii</i><br>Heimerl                                 | Michael J. Moore et<br>al. 704 (OC)     | United States:<br>New Mexico  | KY952283 |
| Nyctaginaceae   | <i>Abronia elliptica</i><br>A.Nelson                                | Norman A. Douglas<br>2039 (DUKE)        | United States:<br>Arizona     | KY952284 |
| Nyctaginaceae   | <i>Abronia fragrans</i> Nutt.<br>ex Hook.                           | Billie L. Turner 20-<br>22 (SRSC)       | United States:<br>Texas       | KY952285 |
| Nyctaginaceae   | <i>Abronia fragrans</i> Nutt.<br>ex Hook.                           | Glenn Kroh et al.<br>3021 (TEX)         | United States:<br>Texas       | KY952286 |
| Nyctaginaceae   | <i>Abronia macrocarpa</i><br>L.A.Galloway                           | Steve L. Orzell et al.<br>6492 (TEX)    | United States:<br>Texas       | KY952287 |
| Nyctaginaceae   | <i>Abronia mellifera</i><br>Douglas ex Hook.                        | N. Elizabeth<br>Saunders BP 19<br>(SIU) | United States:<br>Wyoming     | KY952288 |
| Nyctaginaceae   | <i>Abronia mellifera</i><br>Douglas ex Hook.                        | N. Elizabeth<br>Saunders BP 20<br>(SIU) | United States:<br>Wyoming     | KY952289 |
| Nyctaginaceae   | <i>Abronia nana</i> S.Watson<br>var. <i>nana</i>                    | Robert C. Sivinski et<br>al. 3108 (NMC) | United States:<br>Arizona     | KY952290 |
| Nyctaginaceae   | <i>Abronia umbellata</i> Lam.                                       | N. Elizabeth<br>Saunders LU 45<br>(SIU) | United States:<br>California  | KY952291 |
| Nyctaginaceae   | <i>Acleisanthes acutifolia</i><br>Standl.                           | James Henrickson et<br>al. 22916 (TEX)  | Mexico:<br>Coahuila           | KY952293 |
| Nyctaginaceae   | <i>Acleisanthes<br/>angustifolia</i> (Torr.)<br>R.A.Levin           | Michael J. Moore 460<br>(OC)            | United States:<br>Texas       | KY952294 |
| Nyctaginaceae   | <i>Acleisanthes</i> cf.<br><i>purpusiana</i> (Heimerl)<br>R.A.Levin | James Henrickson<br>23026 (TEX)         | Mexico:<br>Coahuila           | KY952309 |
| Nyctaginaceae   | <i>Acleisanthes<br/>chenopodioides</i><br>(A.Gray) R.A.Levin        | Michael J. Moore et<br>al. 733 (OC)     | United States:<br>Texas       | KY952295 |

|               |                                                                                                                            |                                   |                              |          |
|---------------|----------------------------------------------------------------------------------------------------------------------------|-----------------------------------|------------------------------|----------|
| Nyctaginaceae | <i>Acleisanthes crassifolia</i><br>A.Gray                                                                                  | Michael J. Moore et al. 569 (OC)  | United States:<br>Texas      | KY952296 |
| Nyctaginaceae | <i>Acleisanthes diffusa</i><br>(A.Gray) R.A.Levin var. <i>diffusa</i>                                                      | Michael J. Moore et al. 624 (OC)  | United States:<br>Texas      | KY952297 |
| Nyctaginaceae | <i>Acleisanthes lanceolata</i><br>(Wooton) R.A.Levin var. <i>lanceolata</i>                                                | Michael J. Moore et al. 870 (OC)  | United States:<br>New Mexico | KY952298 |
| Nyctaginaceae | <i>Acleisanthes lanceolata</i><br>(Wooton) R.A.Levin var. <i>lanceolata</i>                                                | Michael J. Moore et al. 903 (OC)  | United States:<br>Texas      | KY952299 |
| Nyctaginaceae | <i>Acleisanthes lanceolata</i><br>(Wooton) R.A.Levin var. <i>megaphylla</i><br>(B.A.Fowler & B.L.Turner) Spellb. & J.Poole | Alfred T. Richardson 1666 (TEX)   | Mexico:<br>Chihuahua         | KY952300 |
| Nyctaginaceae | <i>Acleisanthes longiflora</i><br>A.Gray                                                                                   | Michael J. Moore 435 (OC)         | United States:<br>Texas      | KY952301 |
| Nyctaginaceae | <i>Acleisanthes longiflora</i><br>A.Gray                                                                                   | Michael J. Moore et al. 571 (OC)  | United States:<br>Texas      | KY952302 |
| Nyctaginaceae | <i>Acleisanthes nana</i><br>I.M.Johnst.                                                                                    | Jackie Smith et al. 798 (TEX)     | Mexico: San Luis Potosi      | KY952303 |
| Nyctaginaceae | <i>Acleisanthes obtusa</i><br>(Choisy) Standl.                                                                             | Michael J. Moore et al. 984 (OC)  | United States:<br>Texas      | KY952304 |
| Nyctaginaceae | <i>Acleisanthes palmeri</i><br>(Hemsley) R.A.Levin                                                                         | George S. Hinton 28620 (TEX)      | Mexico: Nuevo Leon           | KY952305 |
| Nyctaginaceae | <i>Acleisanthes parvifolia</i><br>(Torr.) R.A.Levin                                                                        | Michael J. Moore 452 (OC)         | United States:<br>Texas      | KY952306 |
| Nyctaginaceae | <i>Acleisanthes purpusiana</i><br>(Heimerl) R.A.Levin                                                                      | James Henrickson 22709 (TEX)      | Mexico:<br>Coahuila          | KY952307 |
| Nyctaginaceae | <i>Acleisanthes purpusiana</i><br>(Heimerl) R.A.Levin                                                                      | Billie L. Turner 6205 (TEX)       | Mexico:<br>Coahuila          | KY952308 |
| Nyctaginaceae | <i>Acleisanthes undulata</i><br>(B.A.Fowler & B.L.Turner) R.A.Levin                                                        | James Henrickson 23195 (TEX)      | Mexico:<br>Coahuila          | KY952310 |
| Nyctaginaceae | <i>Acleisanthes wrightii</i><br>(A.Gray) Benth. & Hook.                                                                    | Michael J. Moore et al. 620 (OC)  | United States:<br>Texas      | KY952311 |
| Nyctaginaceae | <i>Allionia choisyi</i> Standl.                                                                                            | Norman A. Douglas 2187 (DUKE)     | Mexico:<br>Coahuila          | KY952315 |
| Nyctaginaceae | <i>Allionia incarnata</i> L.                                                                                               | Michael J. Moore et al. 1352 (OC) | Mexico:<br>Nuevo Leon        | KY952316 |
| Nyctaginaceae | <i>Allionia</i> sp.                                                                                                        | Michael J. Moore 424 (OC)         | United States:<br>Texas      | KY952317 |
| Nyctaginaceae | <i>Andradea floribunda</i><br>Allemão                                                                                      | André M. Amorim 2294 (NY)         | Brazil                       | KY952324 |
| Nyctaginaceae | <i>Andradea floribunda</i><br>Allemão                                                                                      | Jacquelyn Ann Kallunki 701 (NY)   | Brazil                       | KY952325 |
| Nyctaginaceae | <i>Anulocaulis annulatus</i>                                                                                               | Richard W.                        | United States:               | KY952326 |

|               |                                                                                                       |                                      |                            |          |
|---------------|-------------------------------------------------------------------------------------------------------|--------------------------------------|----------------------------|----------|
|               | (Coville) Standl.                                                                                     | Spellenberg 3162 (NMC)               | California                 |          |
| Nyctaginaceae | <i>Anulocaulis eriosolenus</i> (A.Gray) Standl.                                                       | James Henrickson et al. 23103 (TEX)  | Mexico: Coahuila           | KY952327 |
| Nyctaginaceae | <i>Anulocaulis eriosolenus</i> (A.Gray) Standl.                                                       | Michael J. Moore et al. 611 (OC)     | United States: Texas       | KY952328 |
| Nyctaginaceae | <i>Anulocaulis hintoniorum</i> B.L.Turner                                                             | Patricia Hernández Ledesma 52 (MEXU) | Mexico: Coahuila           | KY952329 |
| Nyctaginaceae | <i>Anulocaulis leiosolenus</i> (Torr.) Standl. var. <i>gypsogenus</i> (Waterf.) Spellenb. & T.Wootten | Michael J. Moore 402 (OC)            | United States: New Mexico  | KY952330 |
| Nyctaginaceae | <i>Anulocaulis leiosolenus</i> (Torr.) Standl. var. <i>howardii</i> Spellenb. & T.Wootten             | Thomas Wootten et al. s.n. (NMC)     | United States: New Mexico  | KY952331 |
| Nyctaginaceae | <i>Anulocaulis leiosolenus</i> (Torr.) Standl. var. <i>lasianthus</i> I.M.Johnston                    | Michael J. Moore et al. 610 (OC)     | United States: Texas       | KY952332 |
| Nyctaginaceae | <i>Anulocaulis leiosolenus</i> (Torr.) Standl. var. <i>leiosolenus</i>                                | Michael J. Moore 493 (OC)            | United States: Texas       | KY952333 |
| Nyctaginaceae | <i>Anulocaulis leiosolenus</i> (Torr.) Standl. var. <i>leiosolenus</i>                                | Michael J. Moore et al. 825 (OC)     | United States: Nevada      | KY952334 |
| Nyctaginaceae | <i>Anulocaulis leiosolenus</i> (Torr.) Standl. var. <i>leiosolenus</i>                                | Michael J. Moore et al. 853 (OC)     | United States: Arizona     | KY952335 |
| Nyctaginaceae | <i>Anulocaulis reflexus</i> I.M.Johnst.                                                               | Michael J. Moore et al. 242 (TEX)    | Mexico: Chihuahua          | KY952336 |
| Nyctaginaceae | <i>Anulocaulis reflexus</i> I.M.Johnst.                                                               | Michael J. Moore 483 (OC)            | United States: Texas       | KY952337 |
| Nyctaginaceae | <i>Boerhavia anisophylla</i> Torr.                                                                    | Norman A. Douglas 2194 (DUKE)        | Mexico: Durango            | KY952341 |
| Nyctaginaceae | <i>Boerhavia ciliata</i> Brandegee                                                                    | Norman A. Douglas 2145 (DUKE)        | United States: Texas       | KY952342 |
| Nyctaginaceae | <i>Boerhavia coccinea</i> Mill.                                                                       | Michael J. Moore 366 (OC)            | United States: New Mexico  | KY952343 |
| Nyctaginaceae | <i>Boerhavia coulteri</i> (Hook.f.) S.Watson var. <i>palmeri</i> (S.Watson) Spellenb.                 | Richard W. Spellenberg 13273 (NMC)   | United States: Arizona     | KY952344 |
| Nyctaginaceae | <i>Boerhavia dominii</i> Meikle & Hewson                                                              | H. Smyth 42 (NY)                     | Australia: South Australia | KY952345 |
| Nyctaginaceae | <i>Boerhavia gracillima</i> Heimerl                                                                   | Richard W. Spellenberg 12447 (NMC)   | United States: Texas       | KY952347 |
| Nyctaginaceae | <i>Boerhavia intermedia</i> M.E.Jones                                                                 | Richard W. Spellenberg 13279         | United States: Arizona     | KY952348 |

|               |                                                |                                                                  |                                  |          |
|---------------|------------------------------------------------|------------------------------------------------------------------|----------------------------------|----------|
|               |                                                | (NMC)                                                            |                                  |          |
| Nyctaginaceae | <i>Boerhavia lateriflora</i> Standl.           | Norman A. Douglas 2161 (DUKE)                                    | Mexico: Sonora                   | KY952349 |
| Nyctaginaceae | <i>Boerhavia linearifolia</i> A.Gray           | Michael J. Moore et al. 581 (OC)                                 | United States: Texas             | KY952350 |
| Nyctaginaceae | <i>Boerhavia purpurascens</i> A.Gray           | Richard W. Spellenberg 13261 (NMC)                               | United States: Arizona           | KY952351 |
| Nyctaginaceae | <i>Boerhavia repens</i> L.                     | J. S. Rose 2                                                     | United States: Hawaii            | KY952352 |
| Nyctaginaceae | <i>Boerhavia repens</i> L.                     | Richard W. Spellenberg 7183 (NMC)                                | Yemen: Sana                      | KY952353 |
| Nyctaginaceae | <i>Boerhavia</i> sp.                           | Erin Tripp et al. 4090 (OC)                                      | Namibia                          | KY952346 |
| Nyctaginaceae | <i>Boerhavia torreyana</i> (S.Watson) Standl.  | Michael J. Moore et al. 633 (OC)                                 | United States: Texas             | KY952354 |
| Nyctaginaceae | <i>Bougainvillea campanulata</i> Heimerl       | Michael Nee 51257 (TEX)                                          | Bolivia: Santa Cruz              | KY952355 |
| Nyctaginaceae | <i>Bougainvillea glabra</i> Choisy             | Michael J. Moore 538 (OC)                                        | United States: Ohio (cultivated) | KY952356 |
| Nyctaginaceae | <i>Bougainvillea spinosa</i> (Cav.) Heimerl    | J. Saunders et al. 3371 (TEX)                                    | Argentina: San Juan              | KY952357 |
| Nyctaginaceae | <i>Bougainvillea stipitata</i> Griseb.         | Michael Nee 50723 (TEX)                                          | Bolivia: Santa Cruz              | KY952358 |
| Nyctaginaceae | <i>Colignonia glomerata</i> Griseb.            | Michael Nee 52523 (NY)                                           | Bolivia                          | KY952364 |
| Nyctaginaceae | <i>Colignonia scandens</i> Benth.              | Martin Grantham 63 (SFBG living collection, accession 1996-0202) | Ecuador                          | KY952365 |
| Nyctaginaceae | <i>Commicarpus ambiguus</i> Meikle             | Mats Thulin 11015 (UPS)                                          | Somalia: Sanaag                  | KY952366 |
| Nyctaginaceae | <i>Commicarpus arabicus</i> Meikle             | Mats Thulin et al. 9294 (UPS)                                    | Yemen: Taizz                     | KY952367 |
| Nyctaginaceae | <i>Commicarpus arabicus</i> Meikle             | Richard W. Spellenberg 7217 (NMC)                                | Yemen: Ibb                       | KY952368 |
| Nyctaginaceae | <i>Commicarpus arabicus</i> Meikle             | Richard W. Spellenberg 7297 (NMC)                                | Yemen: Ibb                       | KY952369 |
| Nyctaginaceae | <i>Commicarpus australis</i> (Meikle) Govaerts | Richard W. Spellenberg et al. 9469 (NMC)                         | Australia: Western Australia     | KY952370 |
| Nyctaginaceae | <i>Commicarpus boissieri</i> (Heimerl) Cufod.  | Mats Thulin 11423 (UPS)                                          | Oman: Dhofar                     | KY952371 |
| Nyctaginaceae | <i>Commicarpus boissieri</i> (Heimerl) Cufod.  | Carl J. Rothfels et al. 4331                                     | Oman: Ash Sharqiyah              | KY952373 |
| Nyctaginaceae | <i>Commicarpus</i>                             | Patricia Hernández                                               | Mexico: Baja                     | KY952372 |

|               |                                                           |                                                 |                                |          |
|---------------|-----------------------------------------------------------|-------------------------------------------------|--------------------------------|----------|
|               | <i>brandegeei</i> Standl.                                 | Ledesma 55 (MEXU)                               | California Sur                 |          |
| Nyctaginaceae | <i>Commicarpus coctoris</i><br>N.A.Harriman               | Richard W.<br>Spellenberg et al.<br>12883 (NMC) | Mexico:<br>Oaxaca              | KY952374 |
| Nyctaginaceae | <i>Commicarpus commersonii</i> (Baill.)<br>Cavaco         | Mats Thulin et al.<br>11836 (UPS)               | Madagascar:<br>Toliara         | KY952380 |
| Nyctaginaceae | <i>Commicarpus decipiens</i><br>Meikle                    | Erin Tripp et al. 4127<br>(NMC)                 | Namibia                        | KY952375 |
| Nyctaginaceae | <i>Commicarpus grandiflorus</i> (A.Rich.)<br>Standl.      | Mats Thulin et al.<br>9311 (UPS)                | Yemen: Taizz                   | KY952376 |
| Nyctaginaceae | <i>Commicarpus greenwayi</i><br>Meikle                    | Mats Thulin 606<br>(UPS)                        | Tanzania:<br>Iringa            | KY952377 |
| Nyctaginaceae | <i>Commicarpus helenae</i><br>(Roem. & Schult.)<br>Meikle | Richard W.<br>Spellenberg et al.<br>7504 (NMC)  | Yemen:<br>Dhamar               | KY952378 |
| Nyctaginaceae | <i>Commicarpus hiranensis</i><br>Thulin                   | Mats Thulin et al.<br>11225 (UPS)               | Ethiopia:<br>Harerge           | KY952379 |
| Nyctaginaceae | <i>Commicarpus mistus</i><br>Thulin                       | Mats Thulin et al.<br>9786 (UPS)                | Yemen:<br>Mahrah               | KY952381 |
| Nyctaginaceae | <i>Commicarpus parviflorus</i> Thulin                     | Mats Thulin 6318<br>(UPS)                       | Somalia:<br>Banaadir           | KY952382 |
| Nyctaginaceae | <i>Commicarpus pedunculatus</i> (A.Rich.)<br>Cufod.       | Mats Thulin 1301<br>(UPS)                       | Ethiopia:<br>Arussi            | KY952383 |
| Nyctaginaceae | <i>Commicarpus plumbagineus</i> (Cav.)<br>Standl.         | Mats Thulin 10747<br>(UPS)                      | Somalia:<br>Togdheer           | KY952384 |
| Nyctaginaceae | <i>Commicarpus plumbagineus</i> (Cav.)<br>Standl.         | Mats Thulin et al.<br>11330 (UPS)               | Ethiopia:<br>Harerge           | KY952385 |
| Nyctaginaceae | <i>Commicarpus plumbagineus</i> (Cav.)<br>Standl.         | Richard W.<br>Spellenberg et al.<br>7374 (NMC)  | Yemen: Ta'izz                  | KY952386 |
| Nyctaginaceae | <i>Commicarpus praetermissus</i><br>N.A.Harriman          | Richard W.<br>Spellenberg et al.<br>12905 (NMC) | Mexico:<br>Michoacán           | KY952387 |
| Nyctaginaceae | <i>Commicarpus reniformis</i><br>(Chiov.) Cufod.          | Mats Thulin 4200<br>(UPS)                       | Somalia: Sool                  | KY952388 |
| Nyctaginaceae | <i>Commicarpus reniformis</i><br>(Chiov.) Cufod.          | Mats Thulin et al.<br>8337 (UPS)                | Yemen:<br>Hadramaut            | KY952389 |
| Nyctaginaceae | <i>Commicarpus scandens</i><br>(L.) Standl.               | Michael J. Moore<br>1127 (OC)                   | United States:<br>Texas        | KY952390 |
| Nyctaginaceae | <i>Commicarpus scandens</i><br>(L.) Standl.               | Richard W.<br>Spellenberg et al.<br>12887 (NMC) | Mexico:<br>Puebla              | KY952391 |
| Nyctaginaceae | <i>Commicarpus sinuatus</i><br>Meikle                     | Mats Thulin 10737<br>(UPS)                      | Somalia:<br>Woqooyi<br>Galbeed | KY952392 |

|               |                                                                               |                                                |                              |          |
|---------------|-------------------------------------------------------------------------------|------------------------------------------------|------------------------------|----------|
| Nyctaginaceae | <i>Commicarpus sinuatus</i><br>Meikle                                         | Richard W.<br>Spellenberg 7144<br>(NMC)        | Yemen:<br>Sana'a             | KY952393 |
| Nyctaginaceae | <i>Commicarpus sinuatus</i><br>Meikle                                         | Richard W.<br>Spellenberg 7506<br>(NMC)        | Yemen:<br>Dhamar             | KY952394 |
| Nyctaginaceae | <i>Commicarpus squarrosus</i> (Heimerl)<br>Standl. var. <i>squarrosus</i>     | Erin Tripp et al. 4049<br>(NMC)                | Namibia                      | KY952395 |
| Nyctaginaceae | <i>Commicarpus stenocarpus</i> (Chiov.)<br>Cufod.                             | Mats Thulin et al.<br>8062 (UPS)               | Yemen:<br>Hadramaut          | KY952396 |
| Nyctaginaceae | <i>Cuscatlania vulcanicola</i><br>Standl.                                     | José L. Linares 12938<br>(MEXU)                | El Salvador:<br>Sonsonate    | KY952397 |
| Nyctaginaceae | <i>Cuscatlania vulcanicola</i><br>Standl.                                     | José L. Linares 13440<br>(MEXU)                | El Salvador:<br>Sonsonate    | KY952398 |
| Nyctaginaceae | <i>Cyphomeris gypsophiloides</i><br>(M.Martens & Galeotti)<br>Standl.         | Michael J. Moore et<br>al. 582 (OC)            | United States:<br>Texas      | KY952399 |
| Nyctaginaceae | <i>Grajalesia fasciculata</i><br>(Standl.) Miranda                            | José L. Linares 13416<br>(MEXU)                | El Salvador:<br>Sonsonate    | KY952409 |
| Nyctaginaceae | <i>Guapira discolor</i><br>(Spreng.) Little                                   | Richard W.<br>Spellenberg 13294<br>(NMC)       | United States:<br>Florida    | KY952410 |
| Nyctaginaceae | <i>Guapira eggersiana</i><br>(Heimerl) Lundell                                | Scott A. Mori<br>25542/40 (NY)                 | French Guiana                | KY952411 |
| Nyctaginaceae | <i>Mirabilis albida</i><br>(Walter) Heimerl                                   | Norman A. Douglas<br>2035 (DUKE)               | United States:<br>Arizona    | KY952416 |
| Nyctaginaceae | <i>Mirabilis albida</i><br>(Walter) Heimerl                                   | William R. Carr<br>11075 (TEX)                 | United States:<br>Texas      | KY952417 |
| Nyctaginaceae | <i>Mirabilis alipes</i><br>(S.Watson) Pilz                                    | Arnold Tiehm 13461<br>(TEX)                    | United States:<br>Nevada     | KY952418 |
| Nyctaginaceae | <i>Mirabilis bigelovii</i><br>A.Gray var. <i>retrorsa</i> (A.<br>Heller) Munz | James D. Morefield<br>et al. 3780 (TEX)        | United States:<br>California | KY952419 |
| Nyctaginaceae | <i>Mirabilis</i> cf. <i>glabrifolia</i><br>(Ortega) I.M.Johnst.               | Michael J. Moore et<br>al. 1244 (OC)           | Mexico: San<br>Luis Potosi   | KY952428 |
| Nyctaginaceae | <i>Mirabilis</i> cf. <i>nesomii</i><br>B.L.Turner                             | George S. Hinton<br>25567 (TEX)                | Mexico:<br>Nuevo Leon        | KY952449 |
| Nyctaginaceae | <i>Mirabilis coccinea</i><br>(Torr.) Benth. & Hook.f.                         | Norman A. Douglas<br>2133 (DUKE)               | United States:<br>Arizona    | KY952420 |
| Nyctaginaceae | <i>Mirabilis coccinea</i><br>(Torr.) Benth. & Hook.f.                         | Steven P.<br>McLaughlin et al.<br>9354 (ARIZ)  | United States:<br>Arizona    | KY952421 |
| Nyctaginaceae | <i>Mirabilis comata</i><br>(Small) Standl.                                    | Norman A. Douglas<br>2084 (DUKE)               | United States:<br>Arizona    | KY952422 |
| Nyctaginaceae | <i>Mirabilis decumbens</i><br>(Nutt.) Daniels                                 | Richard W.<br>Spellenberg et al.<br>4073 (TEX) | Mexico:<br>Zacatecas         | KY952423 |

|               |                                                                                                                |                                             |                               |          |
|---------------|----------------------------------------------------------------------------------------------------------------|---------------------------------------------|-------------------------------|----------|
| Nyctaginaceae | <i>Mirabilis donahooiana</i><br>Le Duc                                                                         | Alice Le Duc et al.<br>247 (TEX)            | Mexico:<br>Michoacán          | KY952424 |
| Nyctaginaceae | <i>Mirabilis exserta</i><br>Brandegee                                                                          | Pedro Tenorio 10586<br>(MEXU)               | Mexico                        | KY952425 |
| Nyctaginaceae | <i>Mirabilis gigantea</i><br>(Standl.) Shinners                                                                | J. Quayle et al. 752<br>(TEX)               | United States:<br>Texas       | KY952426 |
| Nyctaginaceae | <i>Mirabilis glabra</i><br>(S.Watson) Standl.                                                                  | Michael J. Moore et<br>al. 674 (OC)         | United States:<br>New Mexico  | KY952446 |
| Nyctaginaceae | <i>Mirabilis glabrifolia</i><br>(Ortega) I.M.Johnst.                                                           | Guy Nesom et al.<br>7654 (TEX)              | Mexico:<br>Coahuila           | KY952427 |
| Nyctaginaceae | <i>Mirabilis glabrifolia</i><br>(Ortega) I.M.Johnst.                                                           | Michael J. Moore et<br>al. 1325 (OC)        | Mexico:<br>Nuevo Leon         | KY952429 |
| Nyctaginaceae | <i>Mirabilis gracilis</i><br>(Standl.) LeDuc                                                                   | Alice Le Duc et al. 71<br>(TEX)             | Mexico:<br>Jalisco            | KY952430 |
| Nyctaginaceae | <i>Mirabilis grandiflora</i><br>(Standl.) Standl.                                                              | EDL 1863 (MEXU)                             | Mexico                        | KY952431 |
| Nyctaginaceae | <i>Mirabilis greenii</i><br>S.Watson                                                                           | George E. Pilz 998<br>(TEX)                 | United States:<br>California  | KY952432 |
| Nyctaginaceae | <i>Mirabilis himalaica</i><br>(Edgew.) Heimerl var.<br><i>chinensis</i> Heimerl                                | D. E. Boufford et al.<br>32449 (F)          | China: Xizang<br>(Tibet)      | KY952433 |
| Nyctaginaceae | <i>Mirabilis himalaica</i><br>(Edgew.) Heimerl var.<br><i>chinensis</i> Heimerl                                | D. E. Boufford et al.<br>41198 (F)          | China: Xizang<br>(Tibet)      | KY952434 |
| Nyctaginaceae | <i>Mirabilis himalaica</i><br>(Edgew.) Heimerl var.<br><i>chinensis</i> Heimerl                                | D. E. Boufford et al.<br>41435 (F)          | China: Xizang<br>(Tibet)      | KY952435 |
| Nyctaginaceae | <i>Mirabilis hintoniorum</i><br>Le Duc                                                                         | Patricia Hernández<br>Ledesma 118<br>(MEXU) | Mexico:<br>Michoacán          | KY952436 |
| Nyctaginaceae | <i>Mirabilis jalapa</i> L.                                                                                     | Michael J. Moore s.n.                       | United States<br>(cultivated) | KY952437 |
| Nyctaginaceae | <i>Mirabilis laevis</i> (Benth.)<br>Curran                                                                     | Andrew C. Sanders et<br>al. 29410 (TEX)     | United States:<br>California  | KY952438 |
| Nyctaginaceae | <i>Mirabilis latifolia</i><br>(A.Gray) Diggs,<br>Lipscomb & O'Kennon                                           | Victor L. Cory 24549<br>(GH)                | United States:<br>Texas       | KY952439 |
| Nyctaginaceae | <i>Mirabilis linearis</i><br>(Pursh) Heimerl                                                                   | Billie L. Turner 21-<br>854 (TEX)           | United States:<br>Texas       | KY952440 |
| Nyctaginaceae | <i>Mirabilis linearis</i><br>(Pursh) Heimerl var.<br><i>decipiens</i> (Standl.)<br>S.L.Welsh                   | Michael J. Moore et<br>al. 1984 (OC)        | Mexico:<br>Coahuila           | KY952441 |
| Nyctaginaceae | <i>Mirabilis longiflora</i> L.                                                                                 | Michael J. Moore et<br>al. 1230 (OC)        | Mexico: San<br>Luis Potosi    | KY952442 |
| Nyctaginaceae | <i>Mirabilis longiflora</i> L.<br>var. <i>wrightiana</i> (A.Gray<br>ex Britton & Kearney)<br>Kearney & Peebles | Alice Le Duc 185<br>(TEX)                   | United States:<br>New Mexico  | KY952443 |
| Nyctaginaceae | <i>Mirabilis melanotricha</i>                                                                                  | Michael J. Moore et                         | Mexico: San                   | KY952444 |

|               |                                                      |                                                    |                                |          |
|---------------|------------------------------------------------------|----------------------------------------------------|--------------------------------|----------|
|               | (Standl.) Spellenb.                                  | al. 1191 (OC)                                      | Luis Potosi                    |          |
| Nyctaginaceae | <i>Mirabilis melanotricha</i><br>(Standl.) Spellenb. | Norman A. Douglas<br>2067 (DUKE)                   | United States:<br>New Mexico   | KY952445 |
| Nyctaginaceae | <i>Mirabilis multiflora</i><br>(Torr.) A.Gray        | Michael J. Moore<br>1110 (OC)                      | United States:<br>Texas        | KY952447 |
| Nyctaginaceae | <i>Mirabilis multiflora</i><br>(Torr.) A.Gray        | Norman A. Douglas<br>2037 (DUKE)                   | United States:<br>Arizona      | KY952448 |
| Nyctaginaceae | <i>Mirabilis nesomii</i><br>B.L.Turner               | Michael J. Moore et<br>al. 2179 (NMC)              | Mexico:<br>Nuevo Leon          | KY952450 |
| Nyctaginaceae | <i>Mirabilis nesomii</i><br>B.L.Turner               | Michael J. Moore et<br>al. 2643 (NMC)              | Mexico:<br>Nuevo Leon          | KY952451 |
| Nyctaginaceae | <i>Mirabilis nyctaginea</i><br>(Michx.) MacMill.     | William R. Carr<br>14590 (TEX)                     | United States:<br>Texas        | KY952452 |
| Nyctaginaceae | <i>Mirabilis oligantha</i><br>(Standl.) Standl.      | José L. Panero 2816<br>(MEXU)                      | Mexico: Baja<br>California     | KY952453 |
| Nyctaginaceae | <i>Mirabilis oxybaphoides</i><br>(A.Gray) A.Gray     | George S. Hinton<br>25572 (TEX)                    | Mexico:<br>Nuevo Leon          | KY952454 |
| Nyctaginaceae | <i>Mirabilis polonii</i> Le Duc                      | Alice Le Duc 259<br>(MEXU)                         | Mexico:<br>Nuevo Leon          | KY952455 |
| Nyctaginaceae | <i>Mirabilis pringlei</i><br>Weath.                  | Alice Le Duc et al. 63<br>(TEX)                    | Mexico:<br>Jalisco             | KY952456 |
| Nyctaginaceae | <i>Mirabilis pudica</i><br>Barneby                   | Arnold Tiehm 10971<br>(TEX)                        | United States:<br>Nevada       | KY952457 |
| Nyctaginaceae | <i>Mirabilis texensis</i><br>(J.M.Coult.) B.L.Turner | Billie L. Turner 22-<br>417 (TEX)                  | United States:<br>Texas        | KY952458 |
| Nyctaginaceae | <i>Mirabilis triflora</i> Benth.                     | Ramón Cuevas G. et<br>al. 3415 (MEXU)              | Mexico:<br>Jalisco             | KY952459 |
| Nyctaginaceae | <i>Mirabilis urbani</i><br>Heimerl                   | Mark Fishbein et al.<br>5107 (MEXU)                | Mexico:<br>Michoacan           | KY952460 |
| Nyctaginaceae | <i>Mirabilis violacea</i> (L.)<br>Heimerl            | Patricia Hernández<br>Ledesma 63 (MEXU)            | Mexico:<br>Distrito<br>Federal | KY952461 |
| Nyctaginaceae | <i>Mirabilis viscosa</i> Cav.                        | Michael J. Moore et<br>al. 1824 (NMC)              | Mexico: San<br>Luis Potosi     | KY952462 |
| Nyctaginaceae | <i>Mirabilis viscosa</i> Cav.                        | Patricia Hernández<br>Ledesma 13 (MEXU)            | Mexico                         | KY952463 |
| Nyctaginaceae | <i>Neea belizensis</i><br>Donn.Sm.                   | Cyrus L. Lundell<br>17692 (TEX)                    | Guatemala:<br>Petén            | KY952465 |
| Nyctaginaceae | <i>Neea cauliflora</i> Poepp.<br>& Endl.             | Schanke S15106<br>(NY)                             | Peru                           | KY952466 |
| Nyctaginaceae | <i>Neea psychotrioides</i><br>Donn.Sm.               | Robert L. Wilbur<br>63654                          | Costa Rica:<br>Heredia         | KY952467 |
| Nyctaginaceae | <i>Nyctaginia capitata</i><br>Choisy                 | Michael J. Moore et<br>al. 617 (OC)                | United States:<br>Texas        | KY952470 |
| Nyctaginaceae | <i>Okenia hypogaea</i><br>Schltdl. & Cham.           | Thomas R. Van<br>Devender et al. 92-<br>1069 (NMC) | Mexico:<br>Sonora              | KY952471 |
| Nyctaginaceae | <i>Pisonia aculeata</i> L.                           | C. Martínez 1209<br>(TEX)                          | Mexico:<br>Oaxaca              | KY952483 |
| Nyctaginaceae | <i>Pisonia brunoniana</i>                            | J. S. Rose 3                                       | United States:                 | KY952484 |



|                | Endl.                                                                   |                                                                                  | Hawaii                       |          |
|----------------|-------------------------------------------------------------------------|----------------------------------------------------------------------------------|------------------------------|----------|
| Nyctaginaceae  | <i>Pisonia capitata</i><br>(S.Watson) Standl.                           | Ana L. Reina<br>Guerrero et al. 2000-<br>193 (NMC)                               | Mexico:<br>Sonora            | KY952485 |
| Nyctaginaceae  | <i>Pisonia capitata</i><br>(S.Watson) Standl.                           | Thomas R. Van<br>Devender et al. 2003-<br>17 (TEX)                               | United States:<br>Arizona    | KY952486 |
| Nyctaginaceae  | <i>Pisonia macranthocarpa</i><br>(Donn.Sm.) Donn.Sm.                    | Dennis E. Breedlove<br>et al. 30361 (TEX)                                        | Mexico:<br>Chiapas           | KY952487 |
| Nyctaginaceae  | <i>Pisonia sandwicensis</i><br>Hillebr.                                 | Flora K. Samis 1<br>(Lyon Arboretum<br>living collection)                        | United States:<br>Hawaii     | KY952488 |
| Nyctaginaceae  | <i>Pisonia sylvatica</i> Standl.                                        | José L. Linares 13403<br>(MEXU)                                                  | El Salvador:<br>Sonsonate    | KY952489 |
| Nyctaginaceae  | <i>Pisonia umbellifera</i><br>(J.R.Forst. & G.Forst.)<br>Seem.          | Flora K. Samis 12<br>(Lyon Arboretum<br>living collection,<br>accession 68.0453) | United States:<br>Hawaii     | KY952490 |
| Nyctaginaceae  | <i>Pisonia zapallo</i> Griseb.                                          | Israel G. Vargas et al.<br>2001 (TEX)                                            | Bolivia: Santa<br>Cruz       | KY952491 |
| Nyctaginaceae  | <i>Pisoniella arborescens</i><br>(Lag. & Rodr.) Standl.                 | Alice Le Duc et al.<br>231 (NMC)                                                 | Mexico:<br>Oaxaca            | KY952492 |
| Nyctaginaceae  | <i>Pisoniella arborescens</i><br>(Lag. & Rodr.) Standl.                 | William R. Anderson<br>13522 (NY)                                                | Mexico:<br>Oaxaca            | KY952493 |
| Nyctaginaceae  | <i>Ramisia brasiliensis</i><br>Oliv.                                    | Jomar G. Jardim<br>1507 (NY)                                                     | Brazil                       | KY952495 |
| Nyctaginaceae  | <i>Reichenbachia hirsuta</i><br>Spreng.                                 | Michael Nee 47813<br>(NY)                                                        | Bolivia                      | KY952496 |
| Nyctaginaceae  | <i>Reichenbachia<br/>paraguayensis</i><br>(D.Parodi) Dugand &<br>Daniel | Maria Maguidaura<br>Hatschbach 49218<br>(NY)                                     | Brazil                       | KY952497 |
| Nyctaginaceae  | <i>Salpianthus arenarius</i><br>Bonpl.                                  | Richard W.<br>Spellenberg 12903<br>(NMC)                                         | Mexico:<br>Michoacán         | KY952503 |
| Nyctaginaceae  | <i>Salpianthus<br/>macrodonatus</i> Standl.                             | Thomas R. Van<br>Devender et al. 91-<br>894 (NMC)                                | Mexico:<br>Sonora            | KY952504 |
| Nyctaginaceae  | <i>Salpianthus<br/>purpurascens</i> (Cav. ex<br>Lag.) Hook. & Arn.      | Richard W.<br>Spellenberg et al.<br>12885 (NMC)                                  | Mexico:<br>Oaxaca            | KY952505 |
| Nyctaginaceae  | <i>Tripterocalyx carneus</i><br>(Greene) L.A.Galloway                   | Norman A. Douglas<br>2060 (DUKE)                                                 | United States:<br>New Mexico | KY952525 |
| Nyctaginaceae  | <i>Tripterocalyx crux-<br/>maltae</i> (Kellogg) Standl.                 | Arnold Tiehm et al.<br>12213 (TEX)                                               | United States:<br>Nevada     | KY952526 |
| Nyctaginaceae  | <i>Tripterocalyx<br/>micranthus</i> (Torr.)<br>Hook.                    | B. MacLeod et al.<br>751 (TEX)                                                   | United States:<br>Colorado   | KY952527 |
| Phytolaccaceae | <i>Agdestis clematidea</i><br>Moc. & Sessé ex DC.                       | George S. Hinton<br>25023 (TEX)                                                  | Mexico:<br>Tamaulipas        | KY952313 |

|                |                                                            |                                                                          |                              |          |
|----------------|------------------------------------------------------------|--------------------------------------------------------------------------|------------------------------|----------|
| Phytolaccaceae | <i>Gallesia integrifolia</i> (Spreng.) Harms               | Michael Nee et al. 50072 (TEX)                                           | Bolivia: Santa Cruz          | KY952407 |
| Phytolaccaceae | <i>Hillieria latifolia</i> (Lam.) H.Walter                 | Michael Nee 33807 (TEX)                                                  | Bolivia: Santa Cruz          | KY952413 |
| Phytolaccaceae | <i>Petiveria alliacea</i> L.                               | Lucas C. Majure 4132 (FLAS)                                              | United States: Florida       | KY952476 |
| Phytolaccaceae | <i>Phytolacca americana</i> L.                             | Michael J. Moore 342 (OC)                                                | United States: Ohio          | KY952480 |
| Phytolaccaceae | <i>Phytolacca icosandra</i> L.                             | Mark H. Mayfield et al. 1001 (TEX)                                       | Mexico: Guerrero             | KY952481 |
| Phytolaccaceae | <i>Phytolacca octandra</i> L.                              | Juan A. Encina et al. 1545 (TEX)                                         | Mexico: Nuevo Leon           | KY952482 |
| Phytolaccaceae | <i>Rivina humilis</i> L.                                   | Michael J. Moore 1129 (OC)                                               | United States: Texas         | KY952499 |
| Phytolaccaceae | <i>Seguieria aculeata</i> Jacq.                            | Elsa Zardini et al. 22101 (TEX)                                          | Paraguay                     | KY952510 |
| Phytolaccaceae | <i>Seguieria paraguariensis</i> Morong                     | Michael Nee 48735 (TEX)                                                  | Bolivia: Santa Cruz          | KY952511 |
| Phytolaccaceae | <i>Trichostigma octandrum</i> (L.) H.Walter                | Michael Nee 47094 (TEX)                                                  | Bolivia: Santa Cruz          | KY952522 |
| Phytolaccaceae | <i>Trichostigma peruvianum</i> (Moq.) H.Walter             | Flora K. Samis 10 (Lyon Arboretum living collection, accession 94.0377)  | United States: Hawaii        | KY952523 |
| Plumbaginaceae | <i>Aegialitis annulata</i> R.Br.                           | Christopher T. Martine 4043 (OC)                                         | Australia: Western Australia | KY952312 |
| Plumbaginaceae | <i>Limonium limbatum</i> Small                             | Michael J. Moore et al. 694 (OC)                                         | United States: New Mexico    | KY952414 |
| Plumbaginaceae | <i>Plumbago scandens</i> L.                                | Michael J. Moore et al. 1828 (OC)                                        | Mexico: San Luis Potosi      | KY952494 |
| Polygonaceae   | <i>Eriogonum longifolium</i> Nutt. var. <i>longifolium</i> | Michael J. Moore 1796 (OC)                                               | United States: Texas         | KY952404 |
| Polygonaceae   | <i>Eriogonum rotundifolium</i> Benth.                      | Michael J. Moore 1769 (OC)                                               | United States: New Mexico    | KY952405 |
| Polygonaceae   | <i>Persicaria odorata</i> LaLlave                          | Flora K. Samis 9 (Lyon Arboretum living collection, accession 88.0439)   | United States: Hawaii        | KY952475 |
| Polygonaceae   | <i>Persicaria</i> sp.                                      | Michael J. Moore 1177                                                    | United States: Ohio          | KY952474 |
| Polygonaceae   | <i>Reynoutria japonica</i> (Houtt.) Ronse Decr.            | Michael J. Moore 2188 (OC)                                               | United States: Ohio          | KY952498 |
| Polygonaceae   | <i>Rumex albescens</i> Hillebr.                            | Flora K. Samis 4 (Lyon Arboretum living collection, accession 2008-0119) | United States: Hawaii        | KY952500 |
| Polygonaceae   | <i>Rumex</i> sp.                                           | Michael J. Moore 1800 (OC)                                               | United States: Texas         | KY952501 |
| Polygonaceae   | <i>Rumex</i> sp.                                           | Michael J. Moore                                                         | United States:               | KY952502 |

|                    |                                               |                                                                          |                            |          |
|--------------------|-----------------------------------------------|--------------------------------------------------------------------------|----------------------------|----------|
|                    |                                               | 1805 (OC)                                                                | Texas                      |          |
| Sarcobataceae      | <i>Sarcobatus vermiculatus</i> (Hook.) Torr.  | Michael J. Moore et al. 813 (OC)                                         | United States: Utah        | KY952508 |
| Stegnospermataceae | <i>Stegnosperma cubense</i> A.Rich.           | Silvia H. Salas Morales 2649 (NY)                                        | Mexico: Oaxaca             | KY952513 |
| Talinaceae         | <i>Talinum</i> cf. <i>aurantiacum</i> Engelm. | Michael J. Moore et al. 1985 (OC)                                        | Mexico: Coahuila           | KY952517 |
| Talinaceae         | <i>Talinum fruticosum</i> (L.) Juss.          | Flora K. Samis 8 (Lyon Arboretum living collection, accession 2012.0008) | United States: Hawaii      | KY952518 |
| Talinaceae         | <i>Talinum paniculatum</i> (Jacq.) Gaertn.    | Michael J. Moore 1789 (OC)                                               | United States (cultivated) | KY952520 |
| Talinaceae         | <i>Talinum</i> sp.                            | Michael J. Moore et al. 1974 (MEXU)                                      | Mexico: Coahuila           | KY952519 |

666

667 **Table 2** List of primers used to amplify the *matK* sequences newly reported here. Within each  
 668 primer name, the number indicates the approximate position of the primer in nucleotides  
 669 downstream from the start of *matK*.

670

| Primer name    | Sequence (5'→3')                | Notes                                                                                                 |
|----------------|---------------------------------|-------------------------------------------------------------------------------------------------------|
| matK.300F.Car  | TTG CAG TCA TTG TGG AAA TTC C   | works broadly across most of Caryophyllales, but generally fails in Caryophyllaceae and Frankeniaceae |
| matK.1350R.Car | GCC AAA GTT CTA GCA CAA GAA AG  | works broadly across most of Caryophyllales                                                           |
| matK.210F.Car  | TTC GGC TAA TGA TTC TCA CCA A   | designed specifically for Caryophyllaceae                                                             |
| matK.1345R.Car | GAG CCA AAG TTC TAG CAC AAG AA  | designed specifically for Caryophyllaceae                                                             |
| matK.1355R.Car | TGT GTT TAC GAG CTA AAG TTC TAG | designed specifically for Caryophyllaceae                                                             |
| matK.300F.Fra  | TCG CTG TCT TTG CTG AAA TTC C   | designed specifically for Frankeniaceae                                                               |

671

672 **Table 3** Summary of WGD events at identified clades with distance to diversification shift and  
 673 climate information. Numbers correspond to those in Figs. 1 and 2.

| # | Putative WGD                               | Distance to diversification shift in nodes ML(BS) | Subtending species (sister) | Mean annual temp °C (sister) | Mean annual precip mm (sister) |
|---|--------------------------------------------|---------------------------------------------------|-----------------------------|------------------------------|--------------------------------|
| 1 | Tribe Nyctagineae within the Nyctaginaceae | 0 (0)                                             | 123 (40)                    | 17.49 (20.08)                | 482.9 (997.08)                 |
| 2 | Phytolaccoid clade                         | 6 (6)                                             | 182 (407)                   | 19.64 (18.36)                | 1007.58 (452.47)               |

|    |                                                                                                   |         |           |               |                      |
|----|---------------------------------------------------------------------------------------------------|---------|-----------|---------------|----------------------|
| 3  | <i>Claytonia</i>                                                                                  | NA      | 38 (15)   | 5.28 (7.25)   | 790.5 (970.36)       |
| 4  | Portulacineae                                                                                     | 1 (1)   | 1600 (38) | 16.19 (19.35) | 699.87 (736.42)      |
| 5  | <i>Amaranthus</i>                                                                                 | 0 (0)   | 28 (1)    | 16.27 (27.09) | 797.74 (117.63)      |
| 6  | Tribe<br>Gomphrenoideae<br>within<br>Amaranthaceae                                                | 7 (7)   | 172 (41)  | 17.91 (16.65) | 871.95 (1289.5)      |
| 7  | in Caryophyllaceae<br>(Alsinoideae +<br>Caryophylloideae<br>sensu Greenberg and<br>Donoghue 2011) | 9 (9)   | 793 (13)  | 11.44 (12.06) | 761.43 (720.00)      |
| 8  | Polygonaceae                                                                                      | 13 (13) | 670 (70)  | 16.3. (16.89) | 1084.17<br>(794.28)  |
| 9  | Plumbaginaceae                                                                                    | NA      | 70 (670)  | 16.89 (16.3)  | 794.28<br>(1084.17)  |
| 10 | Droseraceae                                                                                       | 8 (NA)  | 67 (108)  | 16.3 (19.08)  | 1280.57<br>(1491.72) |
| 11 | Nepenthaceae                                                                                      | 4 (NA)  | 89 (19)   | 22.52 (20.05) | 2170.5<br>(1611.63)  |
| 12 | Ancistrocladaceae                                                                                 | 0 (NA)  | 15 (3)    | 24.17 (25.6)  | 1899.13<br>(2882.4)  |
| 13 | Tamaricaceae                                                                                      | NA      | 19 (3)    | 14.09 (16.21) | 568.32 (469.61)      |

674

675

676 **Table 4** Summary of diversification shifts. Letters correspond to those in Figs. 1 and 2.

| #  | Family                       | Diversification shift                                                    | Mean shift (ML) | Mean shift (BS) |
|----|------------------------------|--------------------------------------------------------------------------|-----------------|-----------------|
| a  | Cactaceae                    | <i>Echinops</i>                                                          | 1.7957          | 2.2008          |
| b  | Cactaceae                    | within <i>Gymnocalycium</i>                                              | 6.9152          |                 |
| c  | Cactaceae                    | <i>Gymnocalycium</i>                                                     | -0.001          | 0.0555          |
| d  | Cactaceae                    | <i>Hylocereus</i> + <i>Selenicereus</i>                                  | 0.1175          |                 |
| e  | Cactaceae                    | <i>Rhipsalis</i> + <i>Schlumbergera</i> + <i>Echinocereus</i> +relatives | 0.0514          |                 |
| f  | Cactaceae                    | <i>Stenocactus</i>                                                       | -0.057          | -0.019          |
| g  | Anacampserotaceae            | <i>Anacampseros</i>                                                      | 0.2624          |                 |
| h  | Portulacaceae                | <i>Portulaca</i>                                                         | 0.0427          | 0.0447          |
| i  | Montiaceae                   | <i>Montiopsis</i>                                                        | 0.9418          |                 |
| j  | Montiaceae                   | Montiaceae                                                               | 0.0325          |                 |
| k  | Aizoaceae                    | <i>Drosanthemum</i> + <i>Delosperma</i> + <i>Hereroa</i> +relatives      | 0.1469          |                 |
| l  | Nyctaginaceae                | <i>Boerhavia</i>                                                         |                 | 0.0747          |
| m  | Nyctaginaceae                | <i>Commicarpus</i>                                                       | 0.9642          |                 |
| n  | Nyctaginaceae                | Tribe Nyctagineae                                                        | 0.0484          | 0.0485          |
| o  | Nyctaginaceae                | <i>Abronia</i>                                                           |                 | -0.084          |
| p  | Nyctag.+Aizo+Cact.+relatives | Nyctag.+Aizo+Cact.+relatives                                             | 0.0168          | 0.019           |
| r  | Amaranthaceae                | <i>Salicornia</i>                                                        | 0.2732          | 0.1649          |
| s  | Amaranthaceae                | <i>Suaeda</i> clade 1                                                    | 0.1027          |                 |
| t  | Amaranthaceae                | <i>Suaeda</i> clade 2                                                    | -0.036          | -0.028          |
| u  | Amaranthaceae                | <i>Atriplex</i>                                                          | 0.0384          |                 |
| v  | Amaranthaceae                | <i>Corispermum</i>                                                       | 0.1186          |                 |
| w  | Amaranthaceae                | <i>Froelichia</i> + <i>Gomphrena</i> +relatives                          | 0.0217          | 0.0132          |
| x  | Amaranthaceae                | <i>Amaranthus</i>                                                        | 0.335           | 0.2049          |
| y  | Caryophyllaceae              | <i>Dianthus</i>                                                          | 0.0662          | 0.0409          |
| z  | Caryophyllaceae              | <i>Cerastium</i>                                                         | 0.7137          |                 |
| aa | Caryophyllaceae              | <i>Arenaria</i>                                                          | 0.4606          | 0.425           |
| bb | Caryophyllaceae              | <i>Moehringia</i>                                                        | 1.0971          | 0.995           |
| cc | Caryophyllaceae              | <i>Schiedea</i>                                                          | 0.2339          | 0.2767          |
| dd | Polygonaceae                 | <i>Fagopyrum</i>                                                         | -0.04           | -0.034          |
| ee | Polygonaceae                 | <i>Eriogonum</i> +relatives                                              | 0.0432          | 0.0364          |
| ff | Nepenthaceae                 | within <i>Nepenthes</i>                                                  | 0.042           |                 |
| gg | Ancistrocladaceae            | <i>Ancistrocladus</i>                                                    | 0.1426          |                 |
| hh | Droseraceae                  | within <i>Drosera 1</i>                                                  | 0.2237          | 0.2076          |
| ii | Droseraceae                  | within <i>Drosera 2</i>                                                  |                 | 0.1622          |

677

678

679 **Figures**

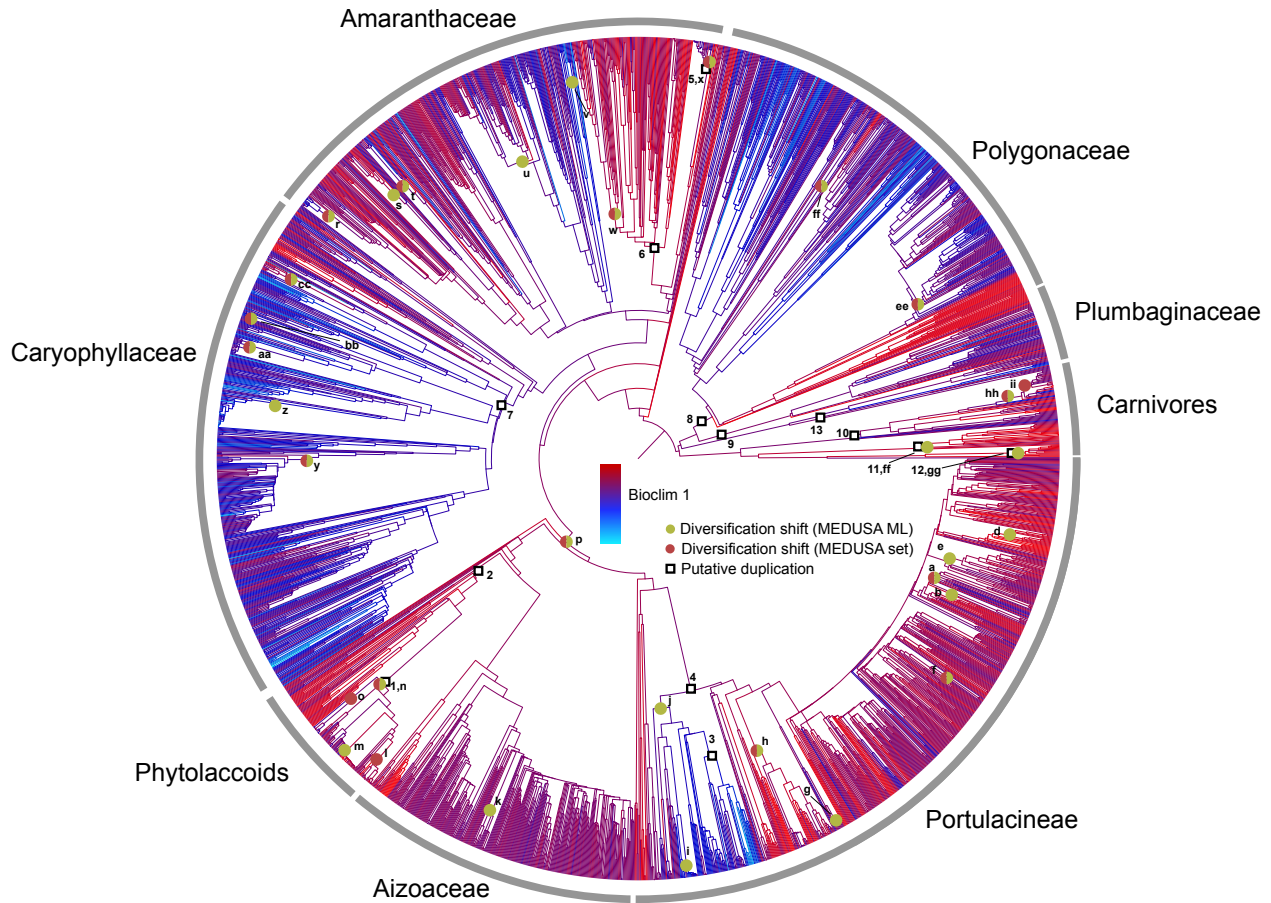

680

681 **Fig. 1** Chronogram of the Caryophyllales with putative WGD mapped along with identified  
682 diversification shifts. Diversification analyses were performed on the maximum likelihood tree  
683 (ML) as well as the bootstrap tree set (set) and those shifts that were identified in both groups are  
684 shown. The branches are colored based on Bioclim variable 1 (Mean Annual Temperature).

685

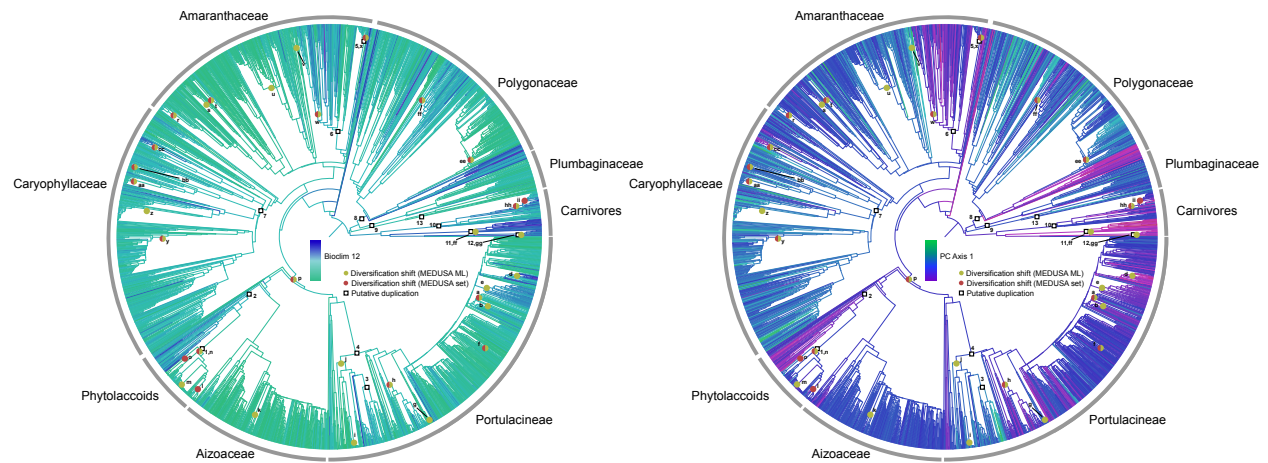

686

687 **Fig. 2** The chronograms and mapping of diversification and WGD are as in Fig. 1 (see caption

688 for details). A) The branches are colored based on Bioclim variable 12 (Mean Annual

689 Precipitation), and B) based on the principal component analyses (PCA) axis 1.

690

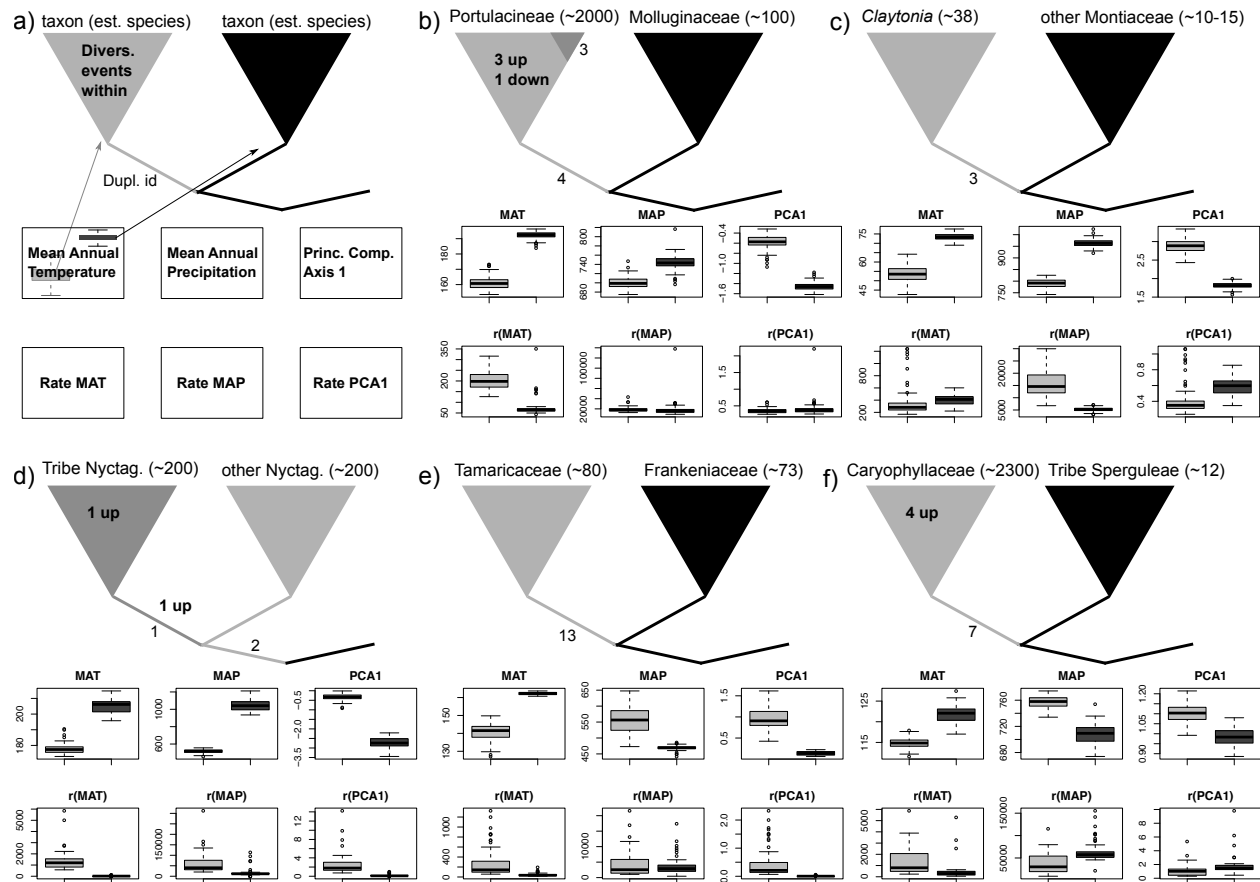

691  
 692 **Fig. 3** Summary of WGD events, with numbers corresponding to those in Table 3, climatic  
 693 variables, and diversification shifts. Numbers along branches denote WGD, with the numbers  
 694 corresponding to those in Fig. 1 and Table 3. Numbers inside clades denote the number of  
 695 diversification rate shifts. Estimated species numbers are listed beside clade names. Box plots  
 696 show the values estimated (ancestral values are listed in the top rows, rates in the bottom rows)  
 697 for both the left and right clades across bootstrap samples. Clades shaded grey denote a WGD.  
 698 b), c), and d) have nested WGD.  
 699



## Supporting Information

- 700 **Fig. S1** The cladogram with support mapped for the bootstrap replicates described in the  
701 methods.
- 702 **Fig. S2** The chronograms and mapping of temperature variables (bioclimatic variables 13-19)  
703 that are not presented in Fig. 1.
- 704 **Fig. S3** The chronograms and mapping of precipitation variables (bioclimatic variables 13-19)  
705 that are not presented in Fig. 2.
- 706 **Fig. S4** The chronograms and mapping of PCA axis 2 on the broader Caryophyllales.
- 707 **Fig. S5** Principal component loadings for bioclimatic variables.
